# Supplementary material for: Cascade nitrosation and addition–elimination of nitroacetanilides for the highly efficient synthesis of 1,4,2,5-dioxadiazine derivatives
Source: Royal Society of Chemistry journal article supplement (doi:10.1039/c3ob42487a), 2014-01-01

**Cascade nitrosation and addition-elimination of  
nitroacetanilides for highly efficient synthesis of  
1,4,2,5-dioxadiazine derivatives**

**Shanyan Mo, Peipei Huang, and Jiaxi Xu**

*State Key Laboratory of Chemical Engineering Resource, Faculty of Science,  
Beijing University of Chemical Technology, Beijing 100029, P. R. China.*

*E-mail: [jxxu@mail.buct.edu.cn](mailto:jxxu@mail.buct.edu.cn)*

**Electronic Supplementary Information**

Copies of  $^1\text{H}$  and  $^{13}\text{C}$  NMR spectra of **2a**

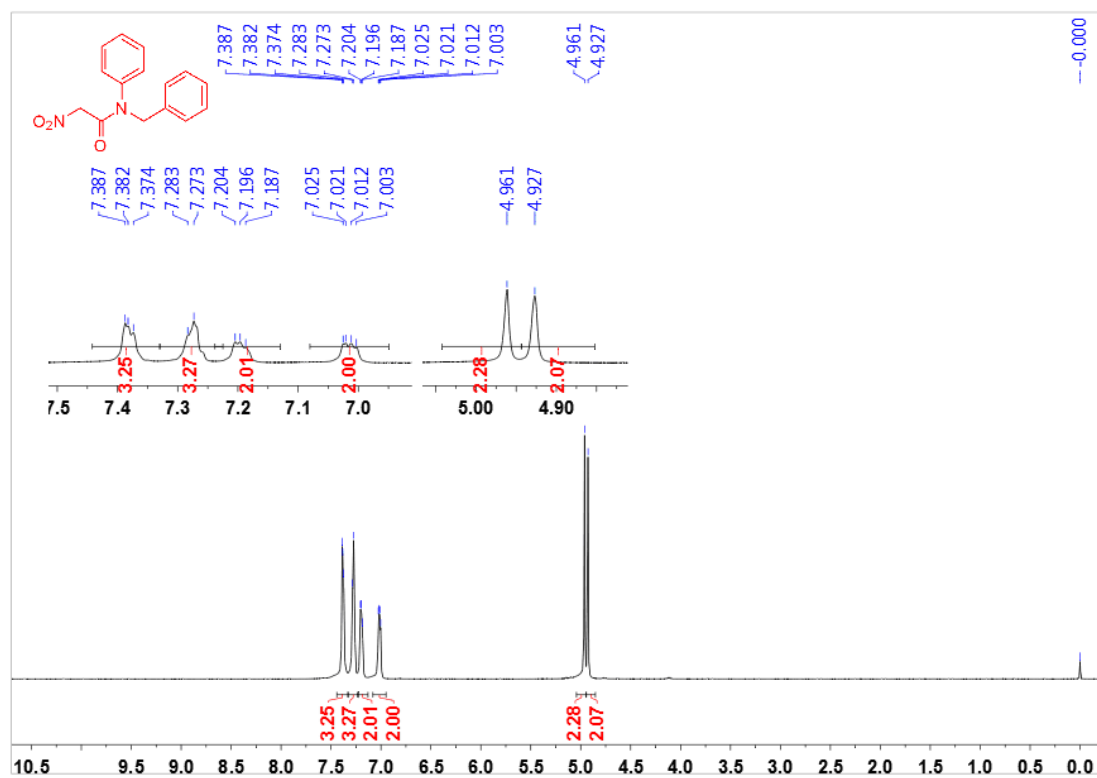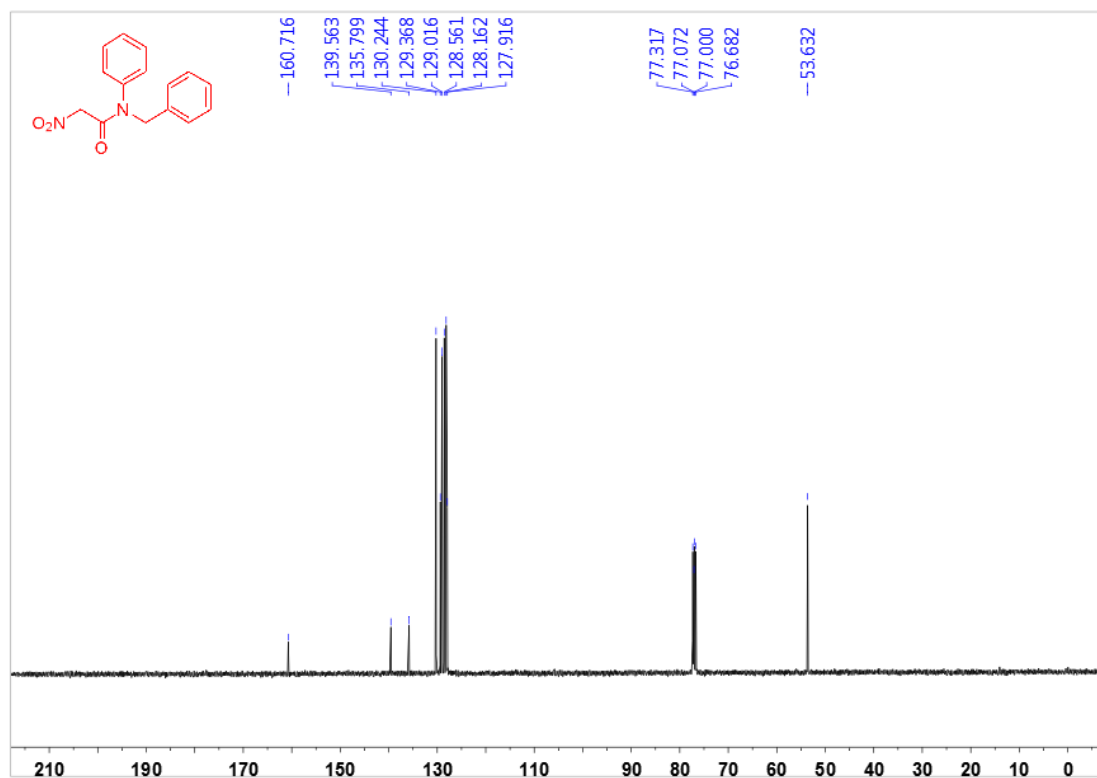

Copies of  $^1\text{H}$  and  $^{13}\text{C}$  NMR spectra of **2b**

$^1\text{H}$  NMR(300MHz, DMSO- $d_6$ )

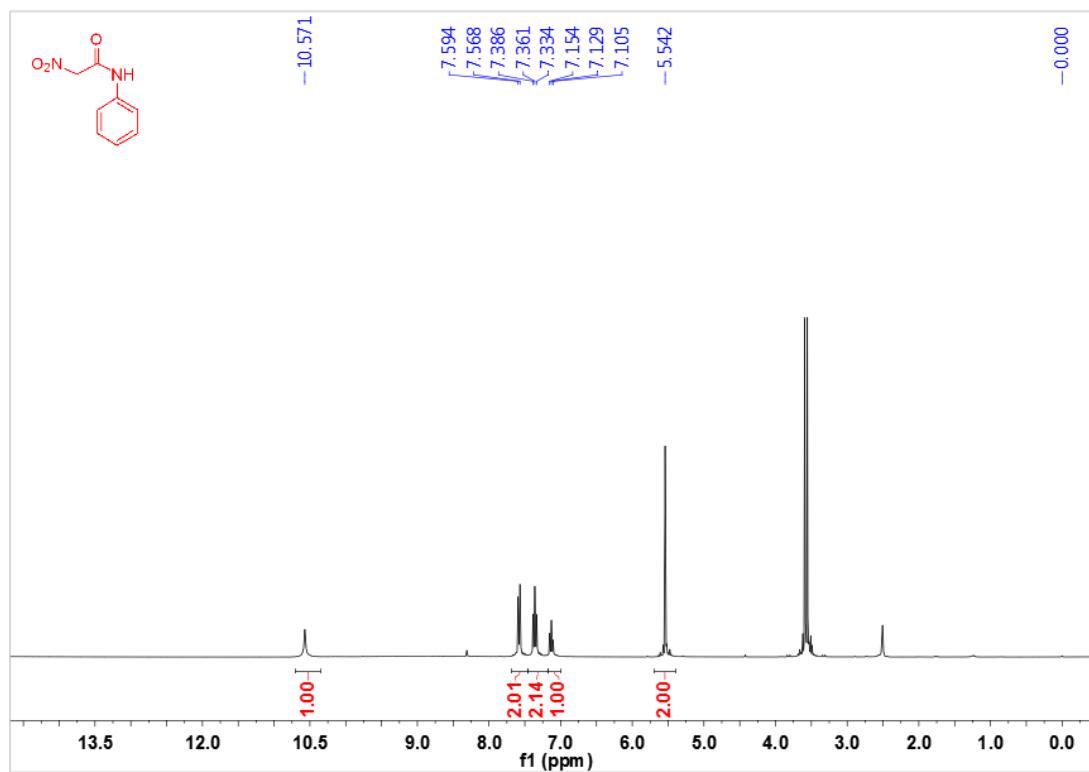

$^{13}\text{C}$  NMR(75MHz, DMSO- $d_6$ )

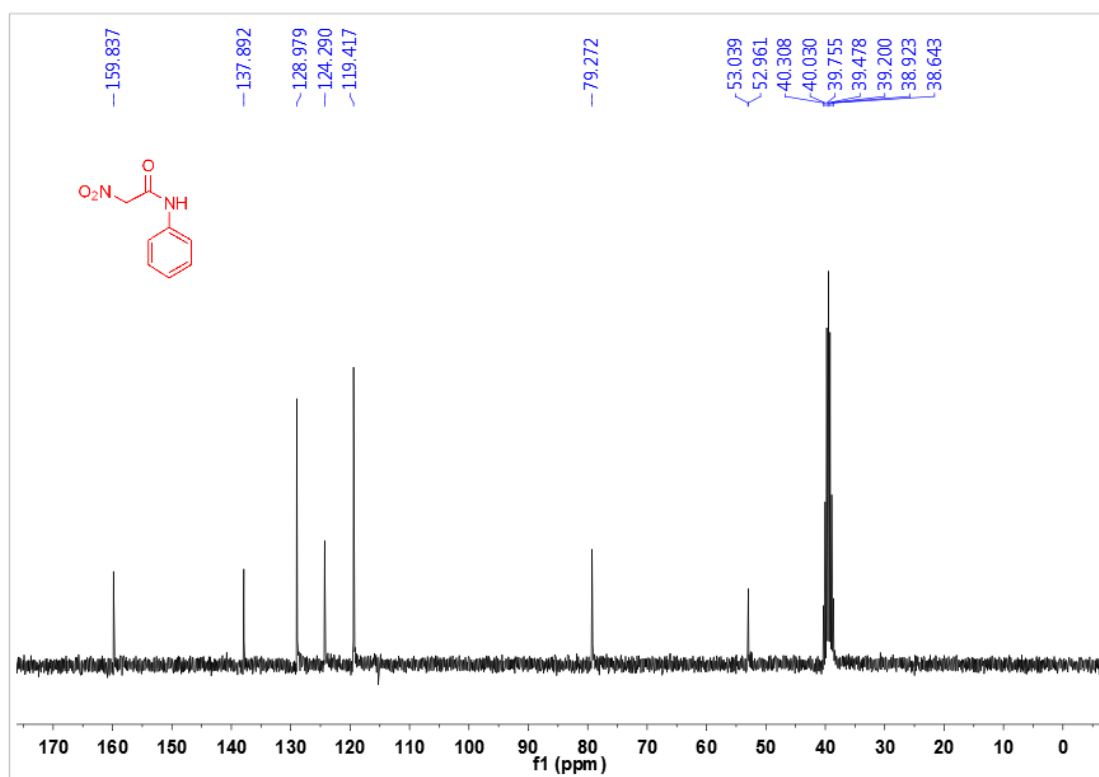

Copies of  $^1\text{H}$  and  $^{13}\text{C}$  NMR spectra of **2c**

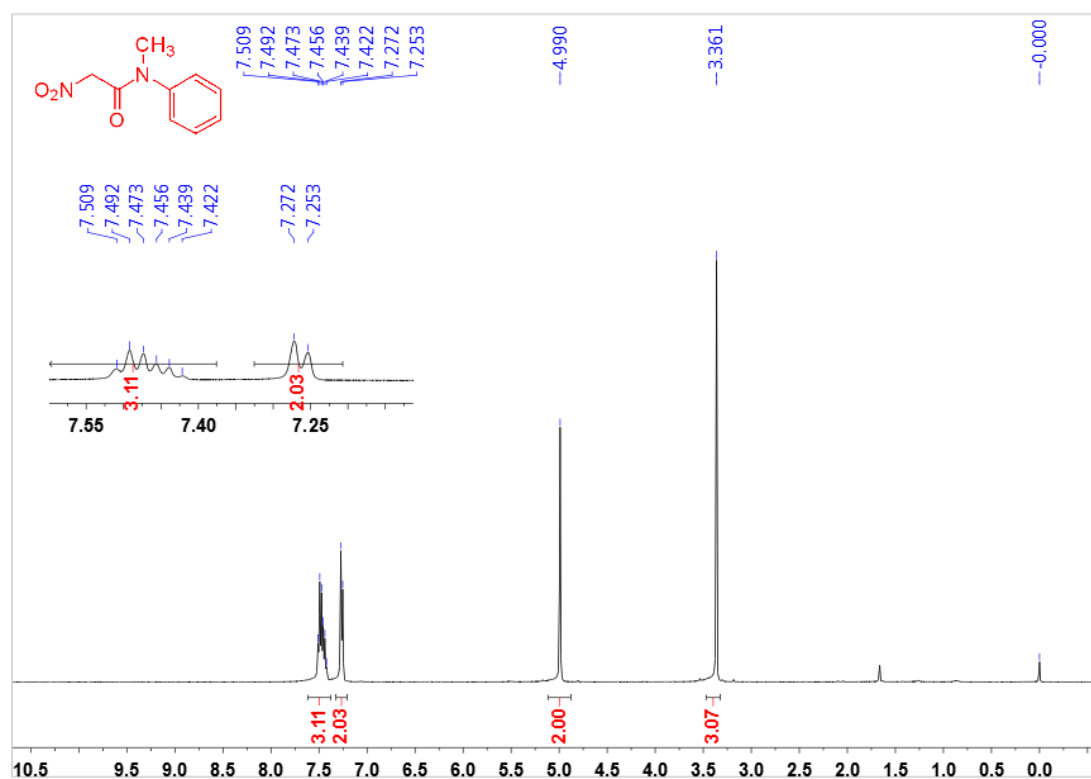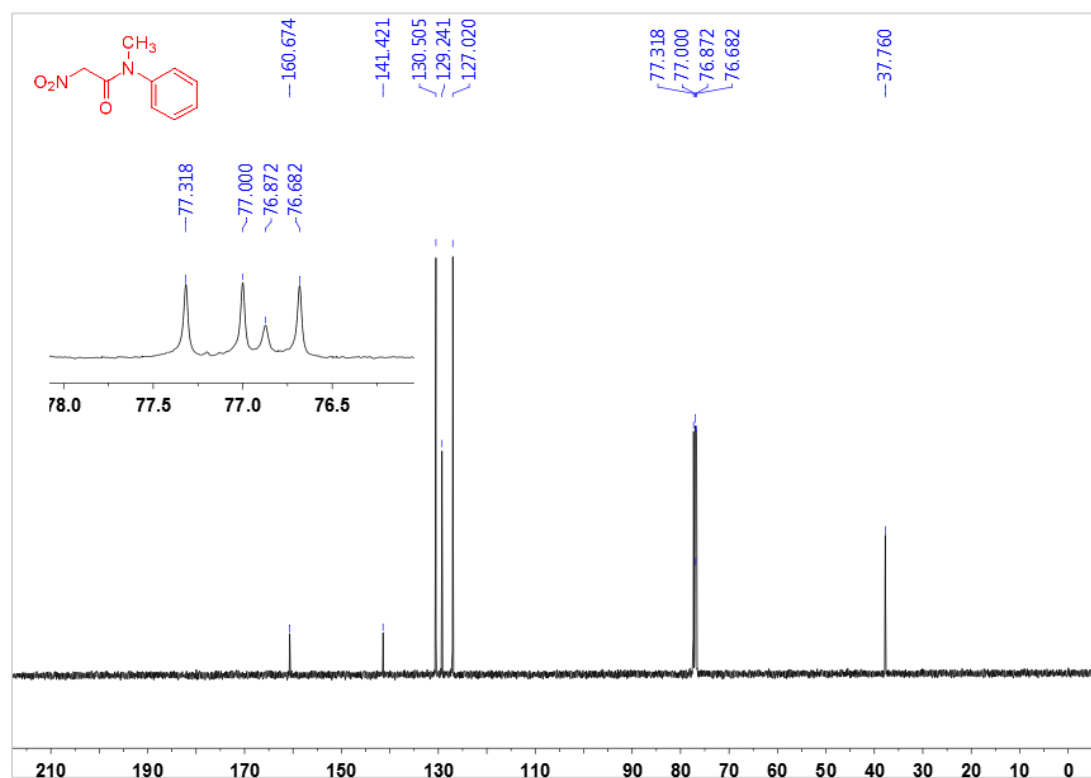

Copies of  $^1\text{H}$  and  $^{13}\text{C}$  NMR spectra of **2d**

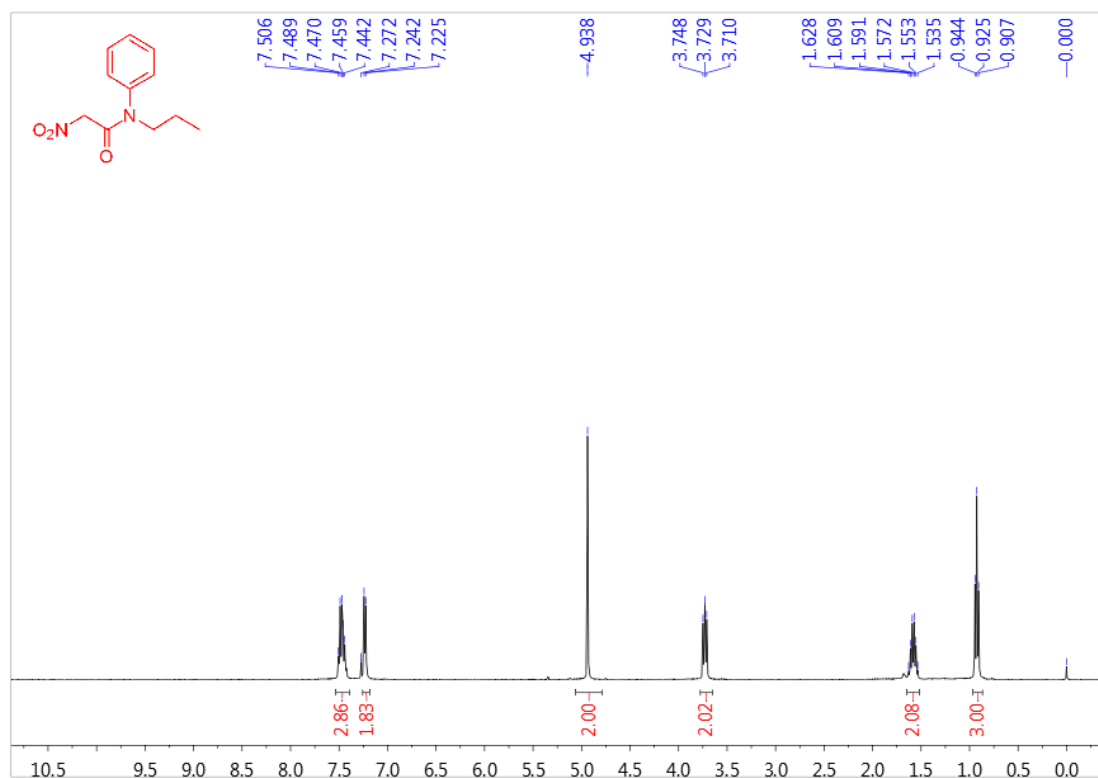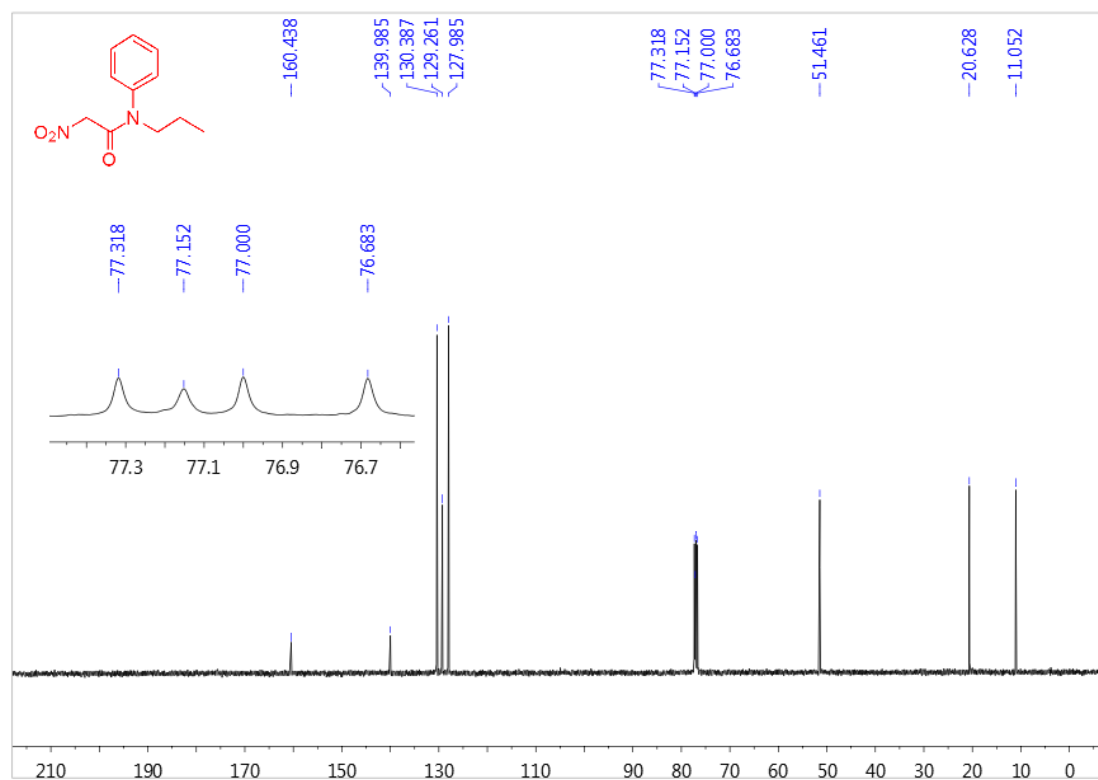

Copies of  $^1\text{H}$  and  $^{13}\text{C}$  NMR spectra of **2e**

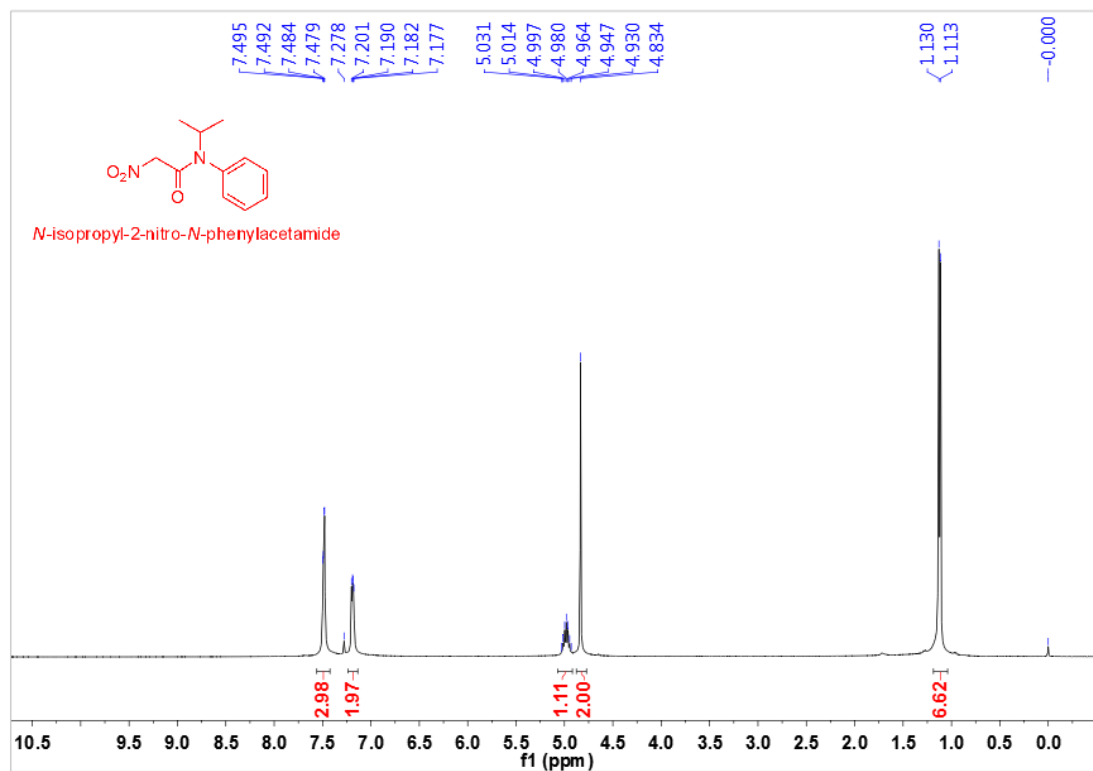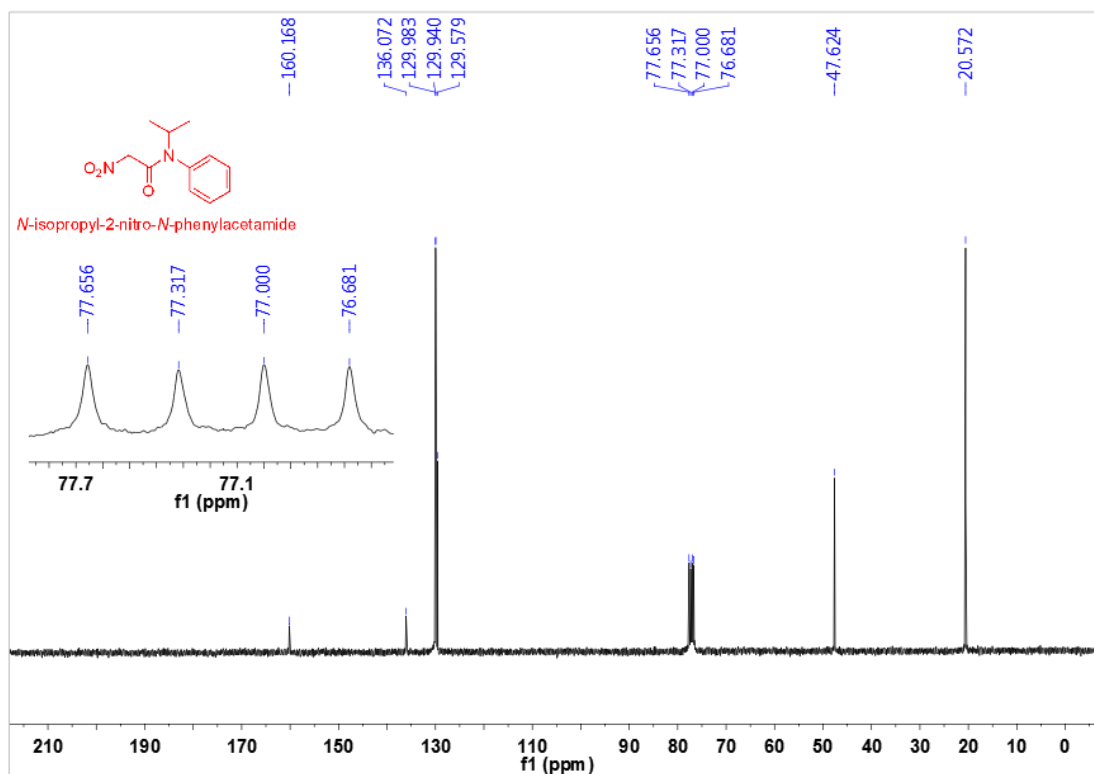

Copies of  $^1\text{H}$  and  $^{13}\text{C}$  NMR spectra of **2f**

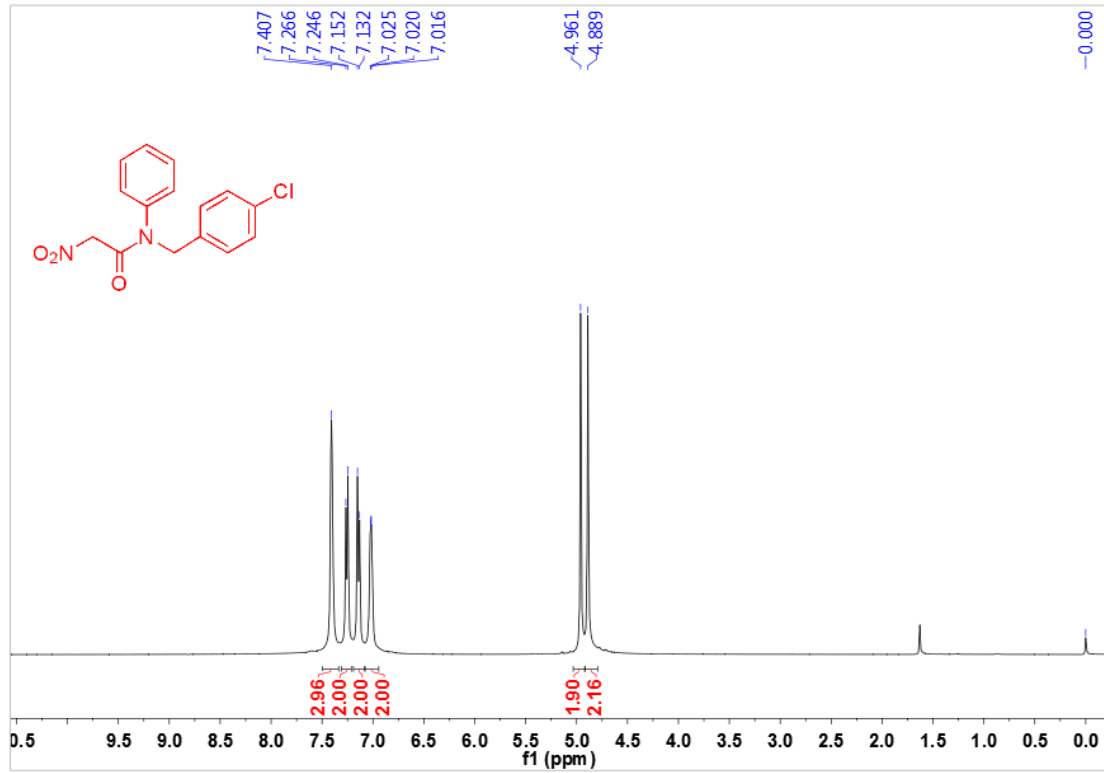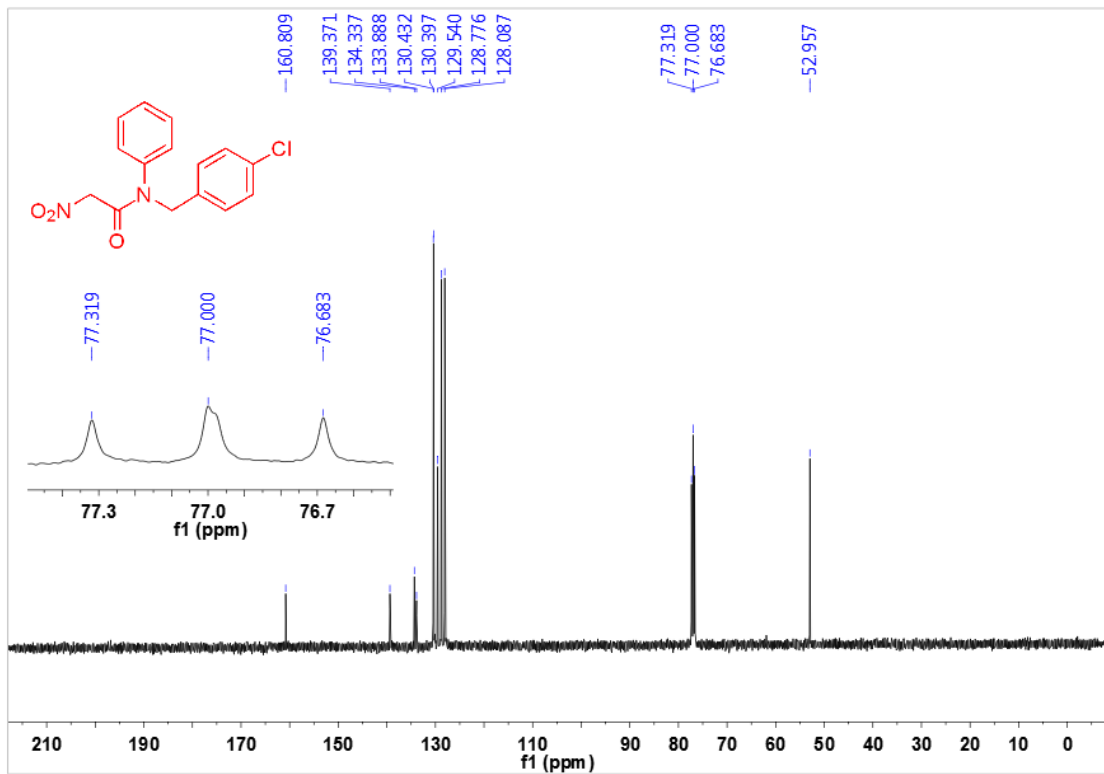

Copies of  $^1\text{H}$  and  $^{13}\text{C}$  NMR spectra of **2g**

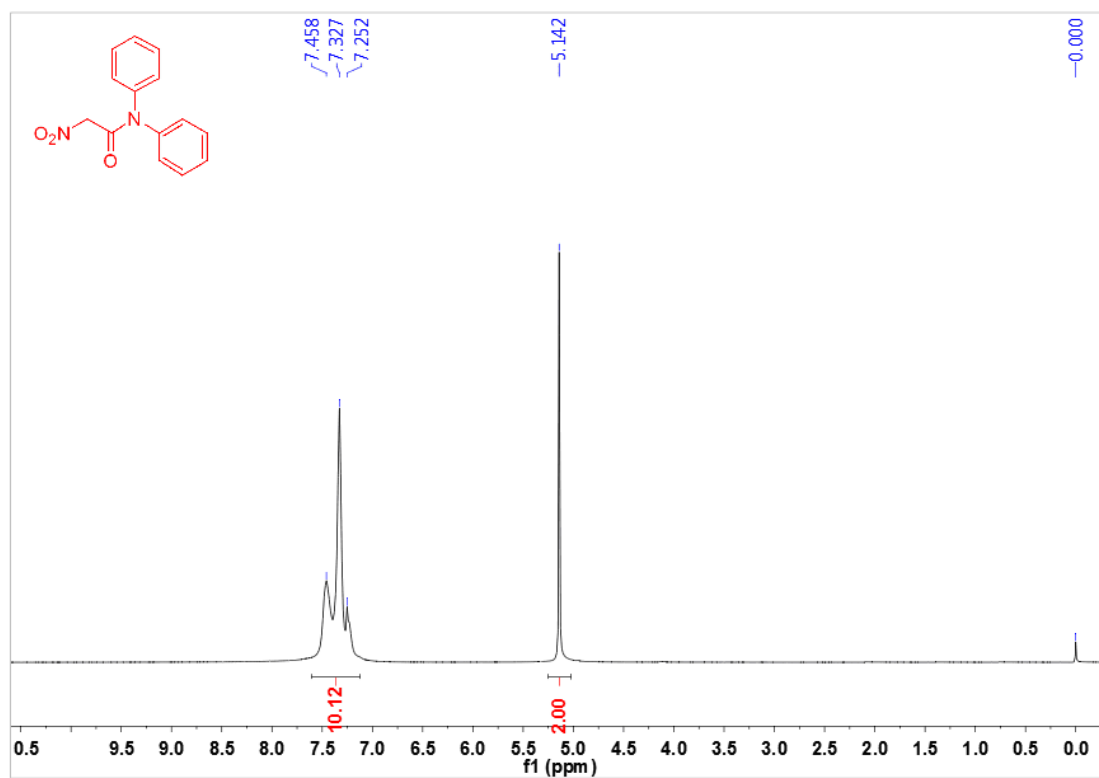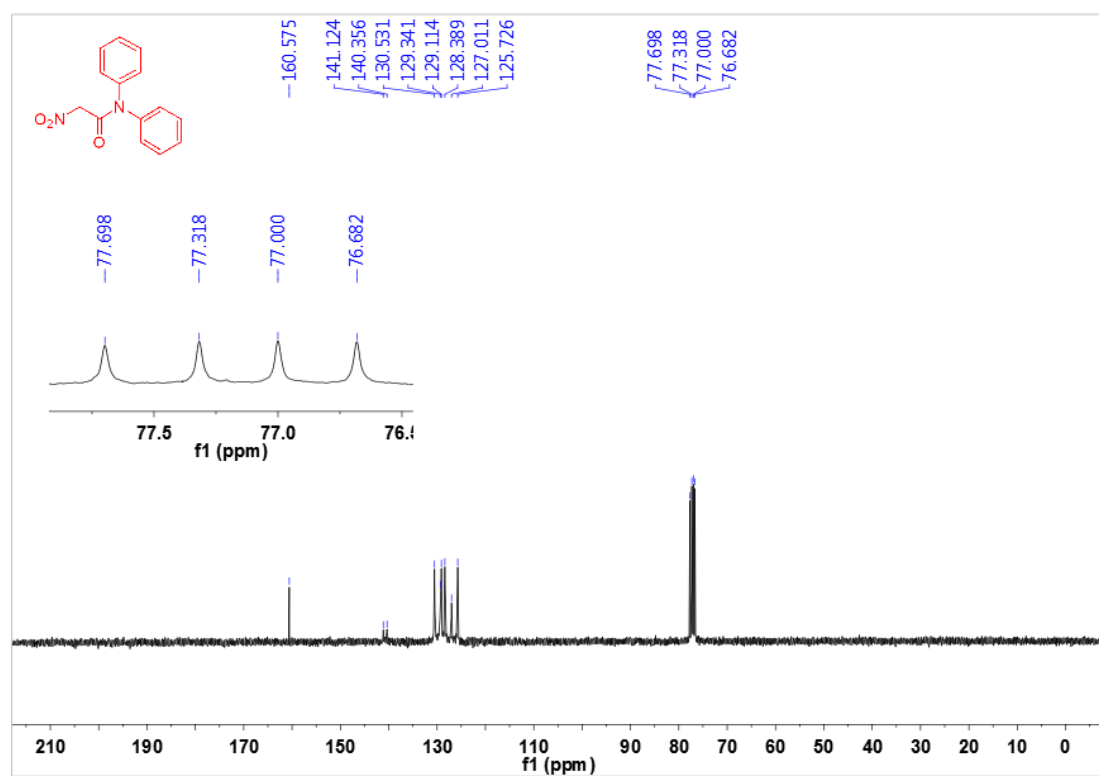



Copies of  $^1\text{H}$  and  $^{13}\text{C}$  NMR spectra of **2h**

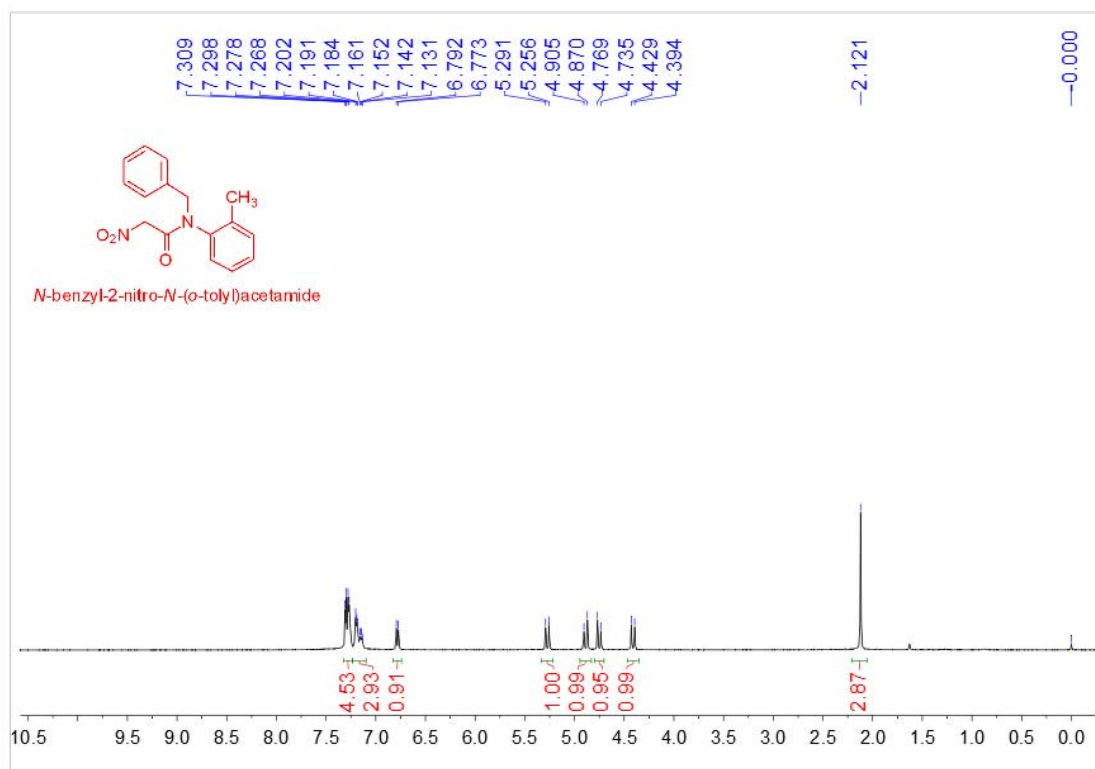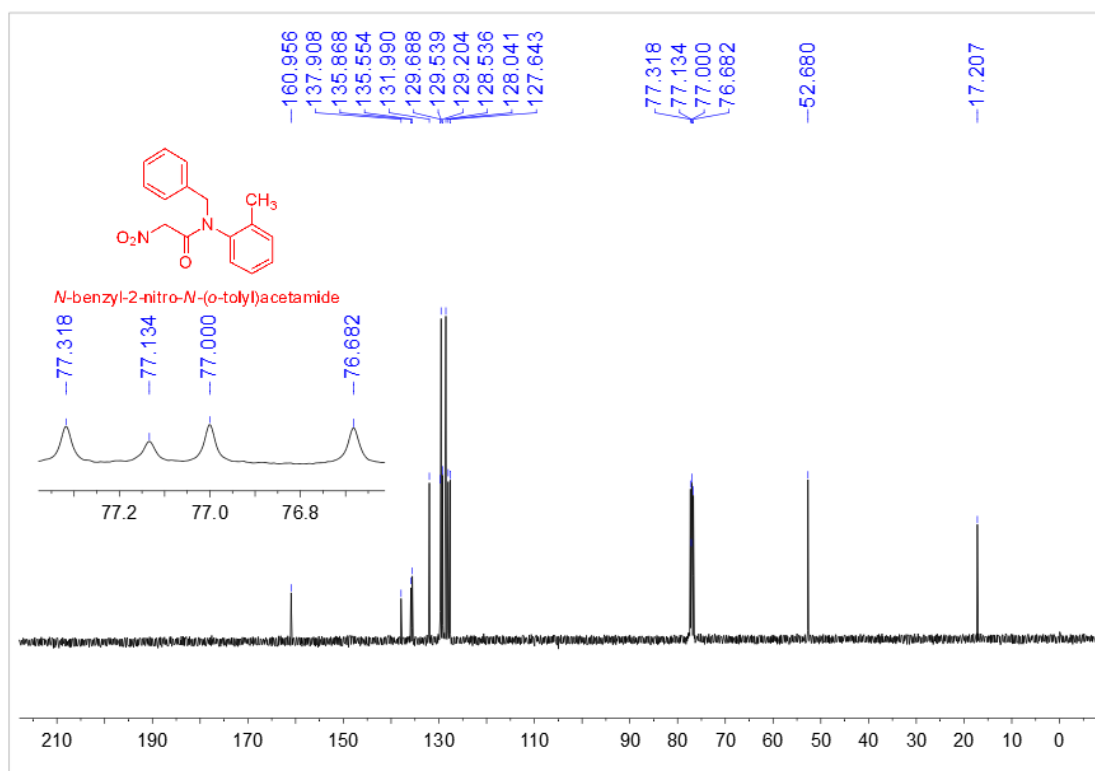

Copies of  $^1\text{H}$  and  $^{13}\text{C}$  NMR spectra of **2i**

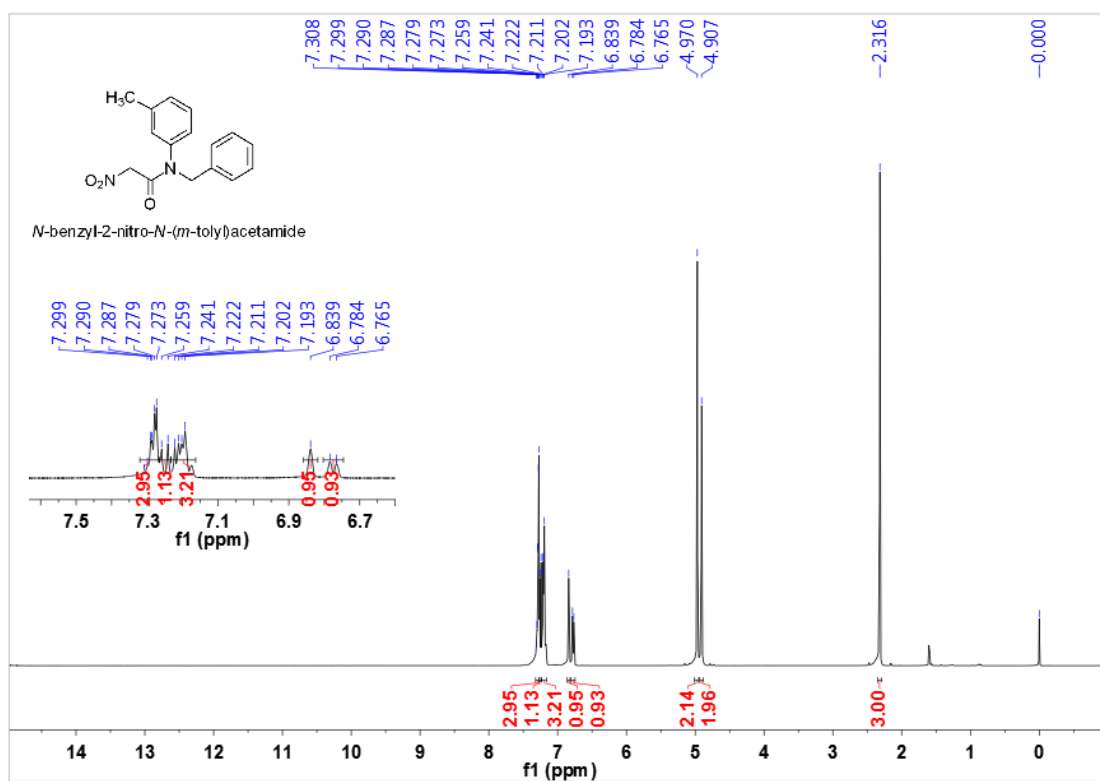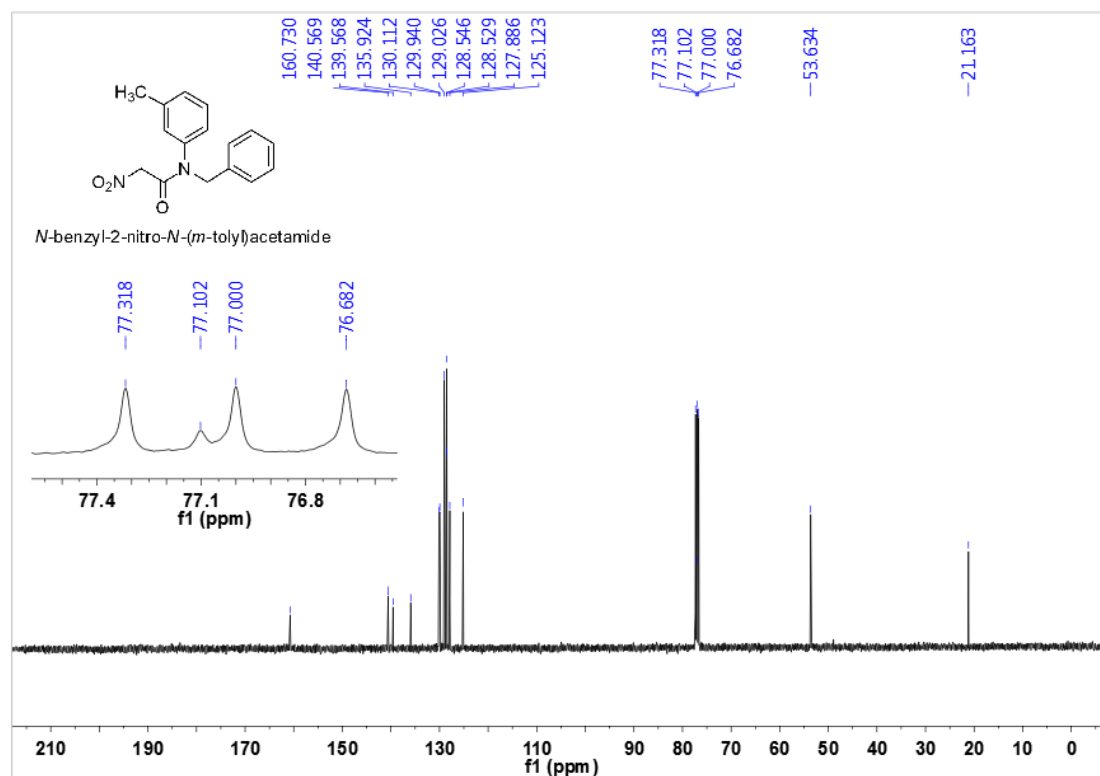

Copies of <sup>1</sup>H and <sup>13</sup>C NMR spectra of **2j**

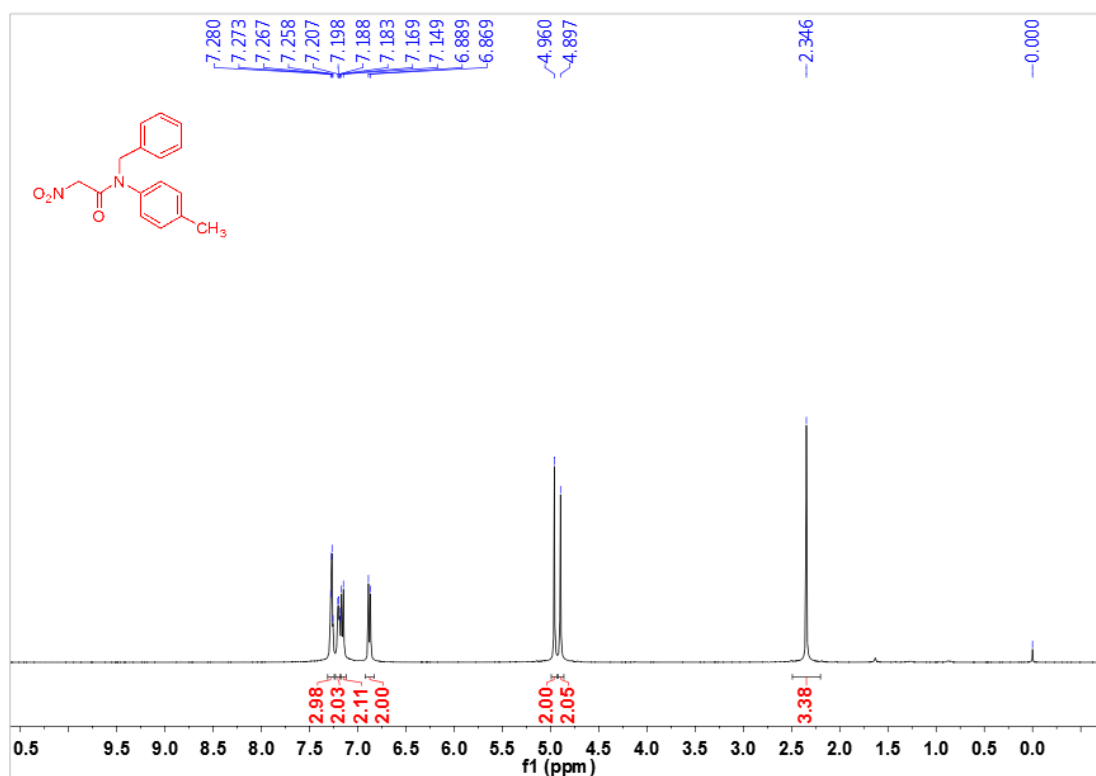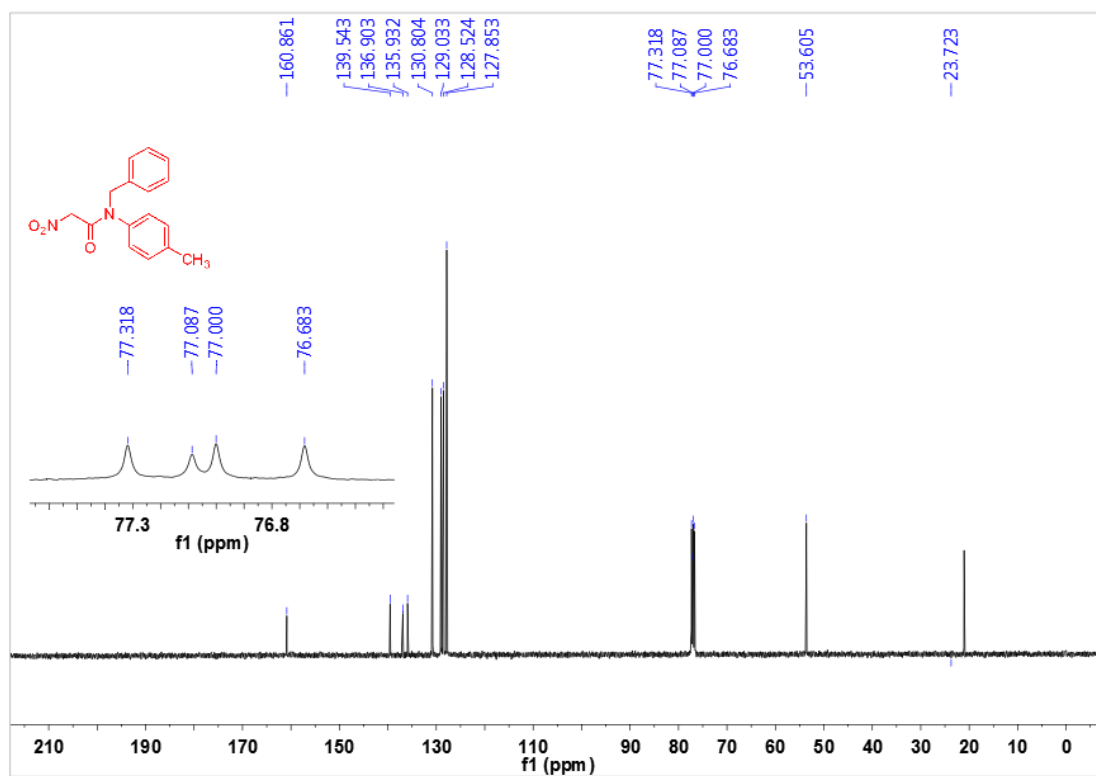

Copies of  $^1\text{H}$  and  $^{13}\text{C}$  NMR spectra of **2k**

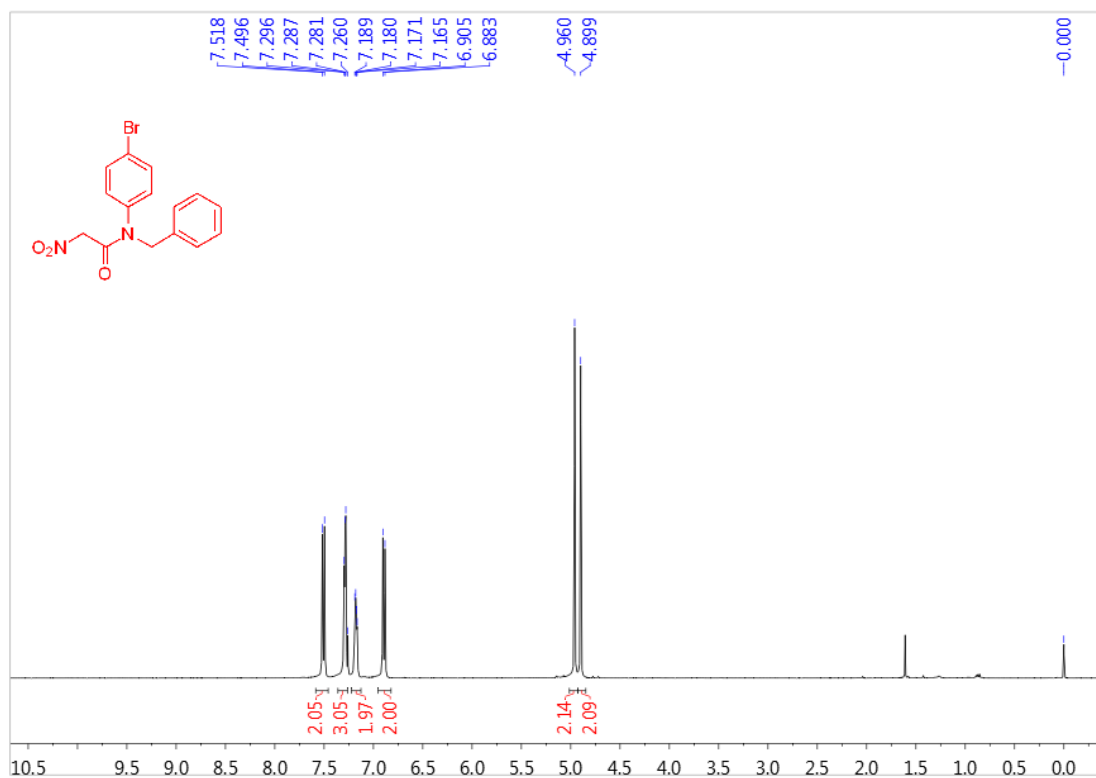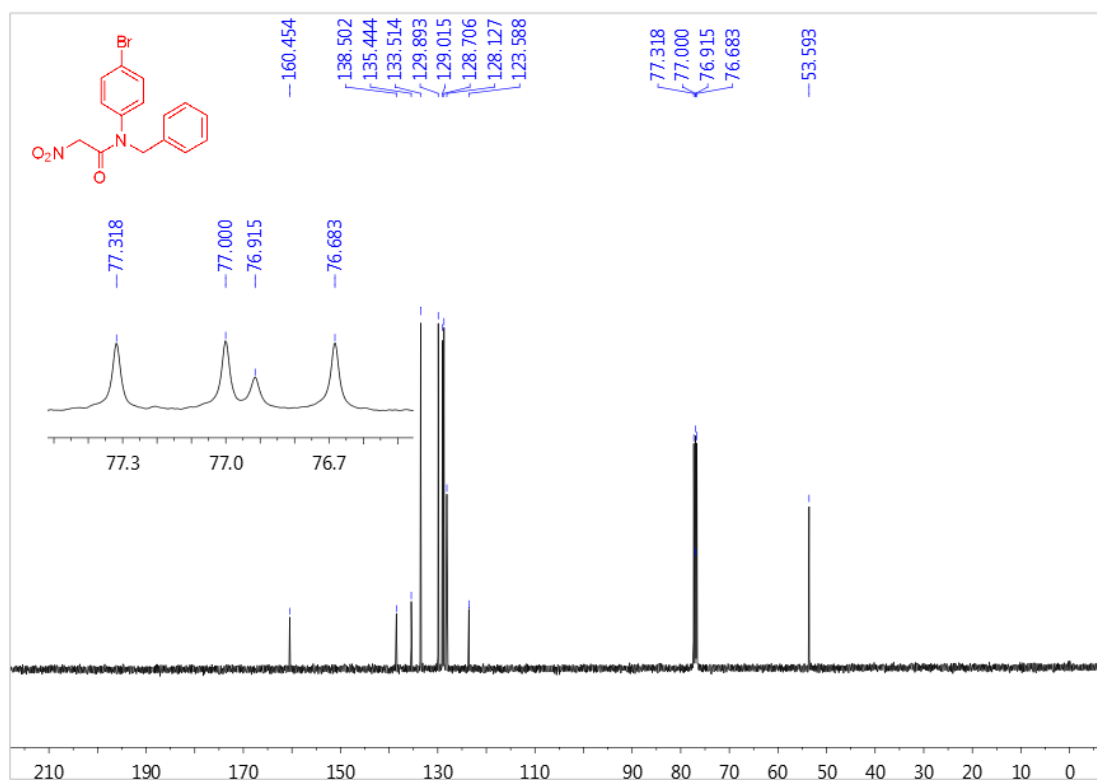

Copies of  $^1\text{H}$  and  $^{13}\text{C}$  NMR spectra of **2I**

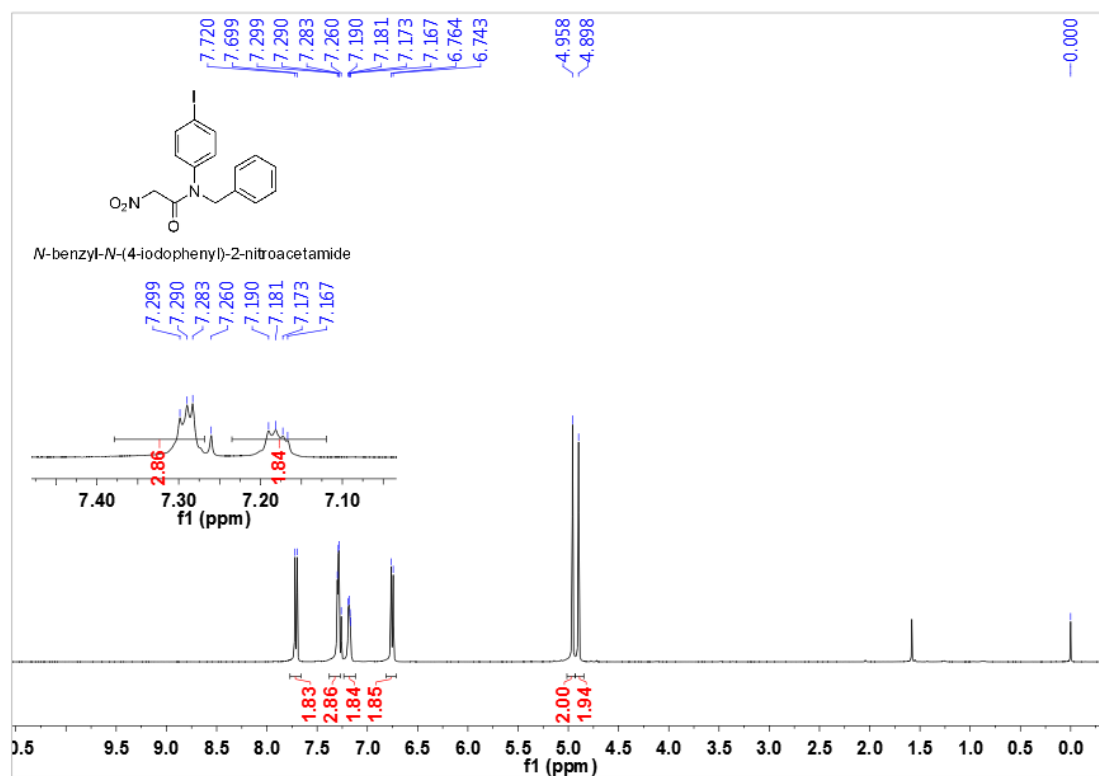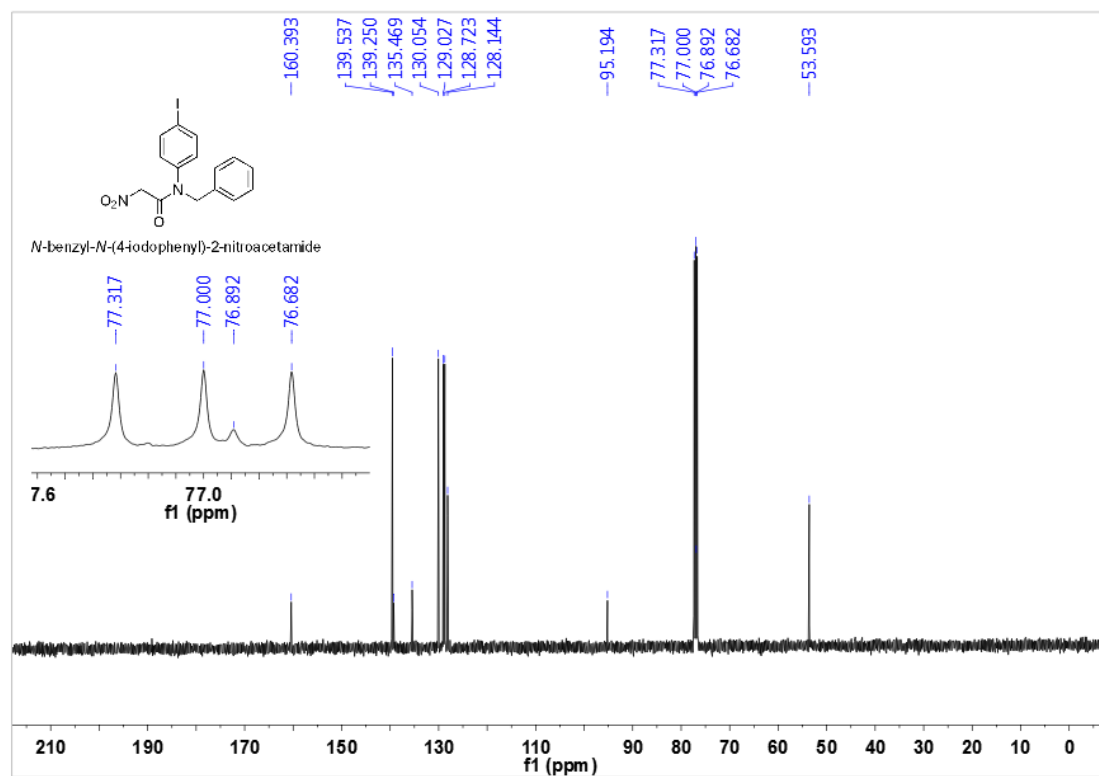

Copies of  $^1\text{H}$  and  $^{13}\text{C}$  NMR spectra of **4c**

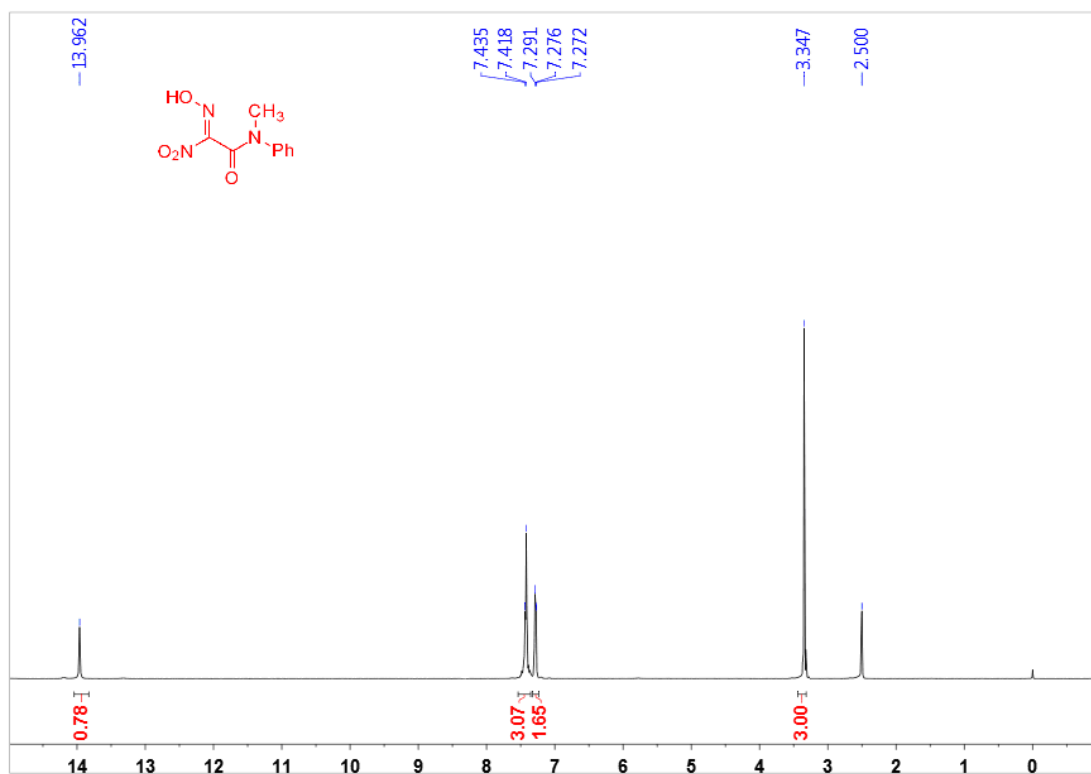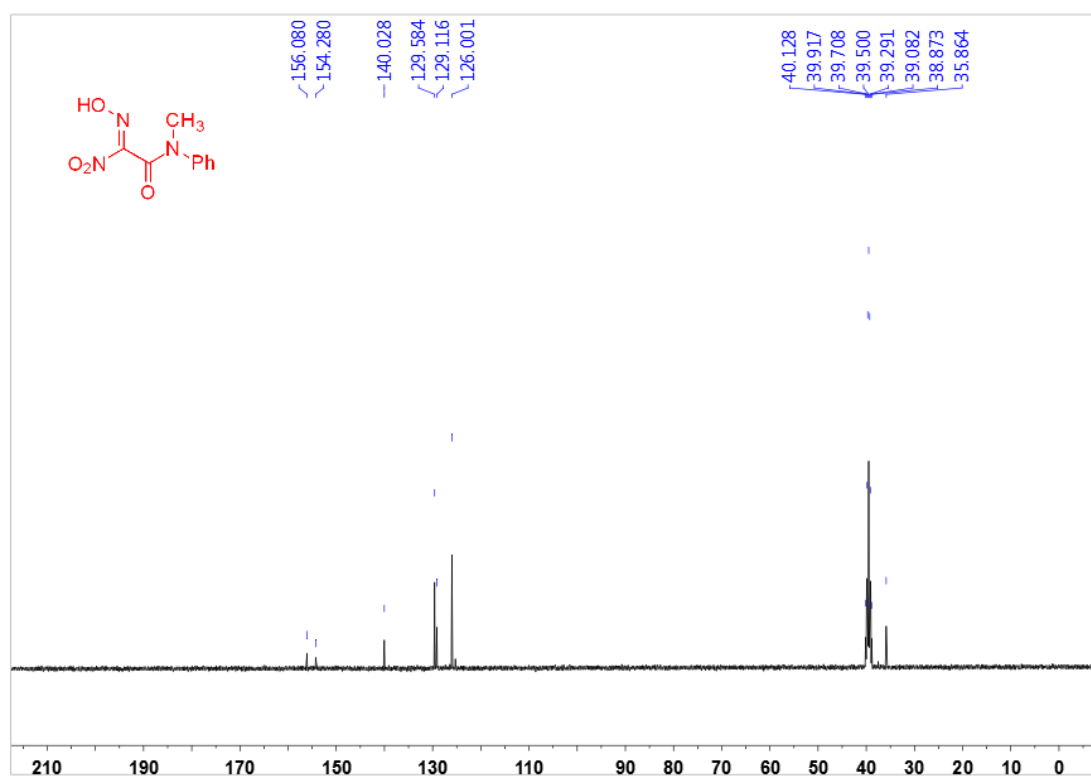

Copies of  $^1\text{H}$  and  $^{13}\text{C}$  NMR spectra of **3a**

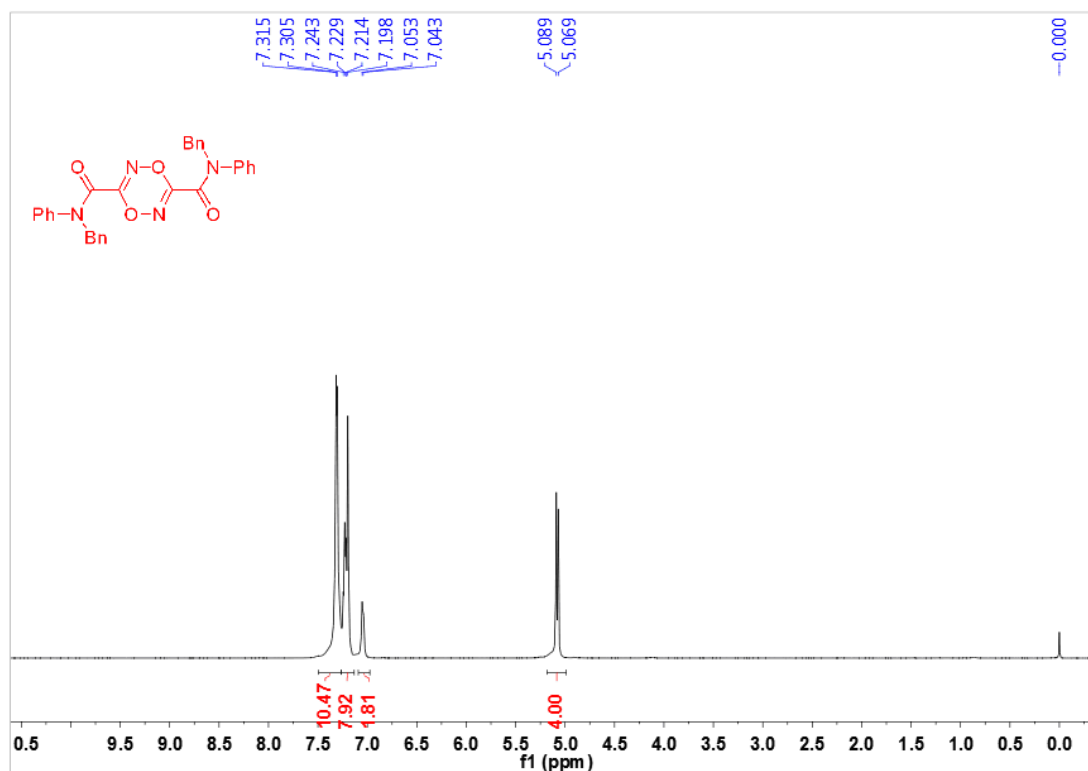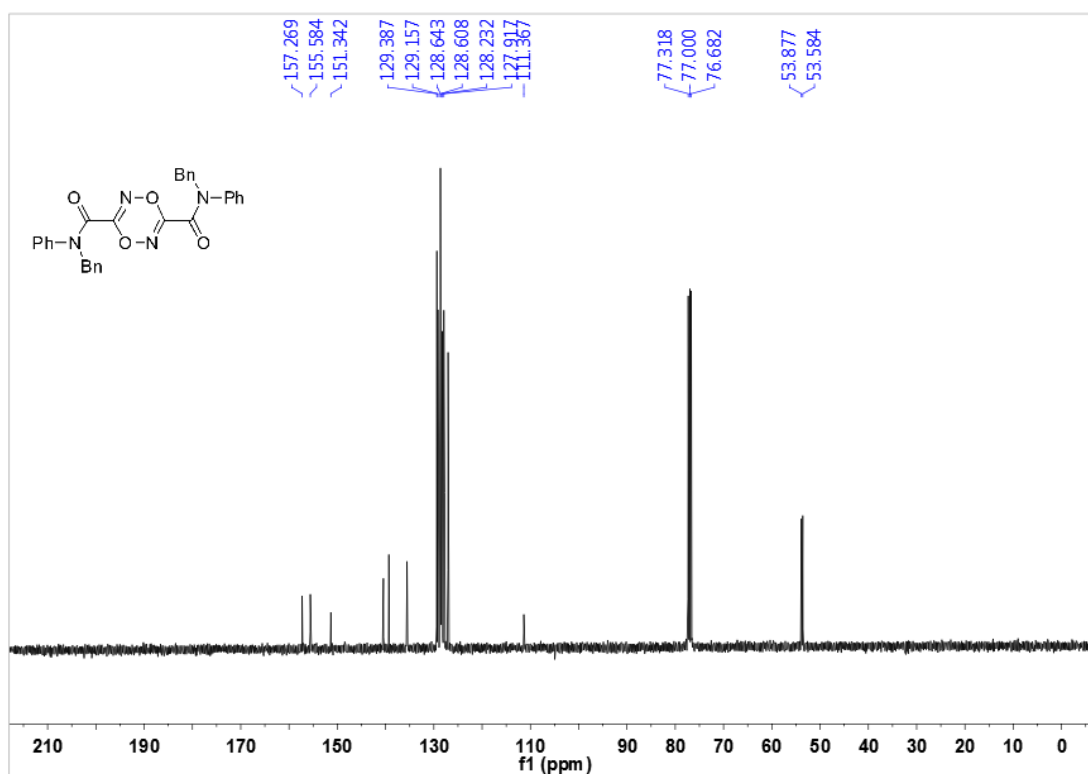

Copies of  $^1\text{H}$  and  $^{13}\text{C}$  NMR spectra of **3b**

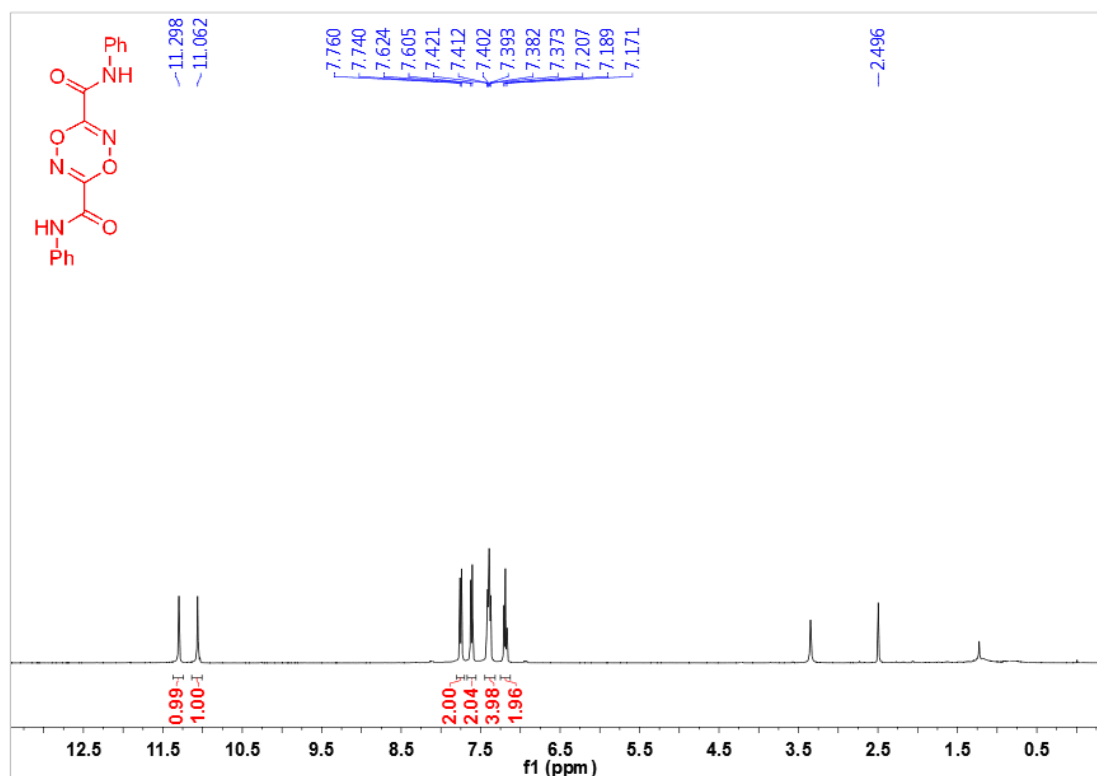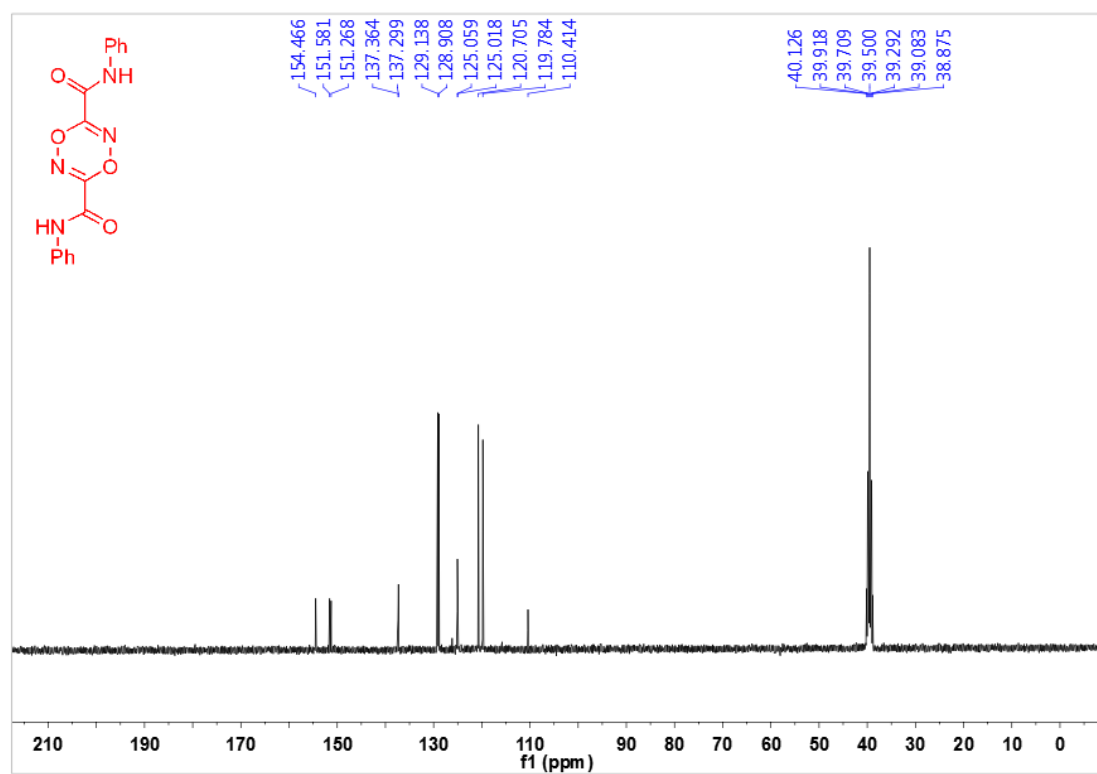



Copies of  $^1\text{H}$  and  $^{13}\text{C}$  NMR spectra of **3c**

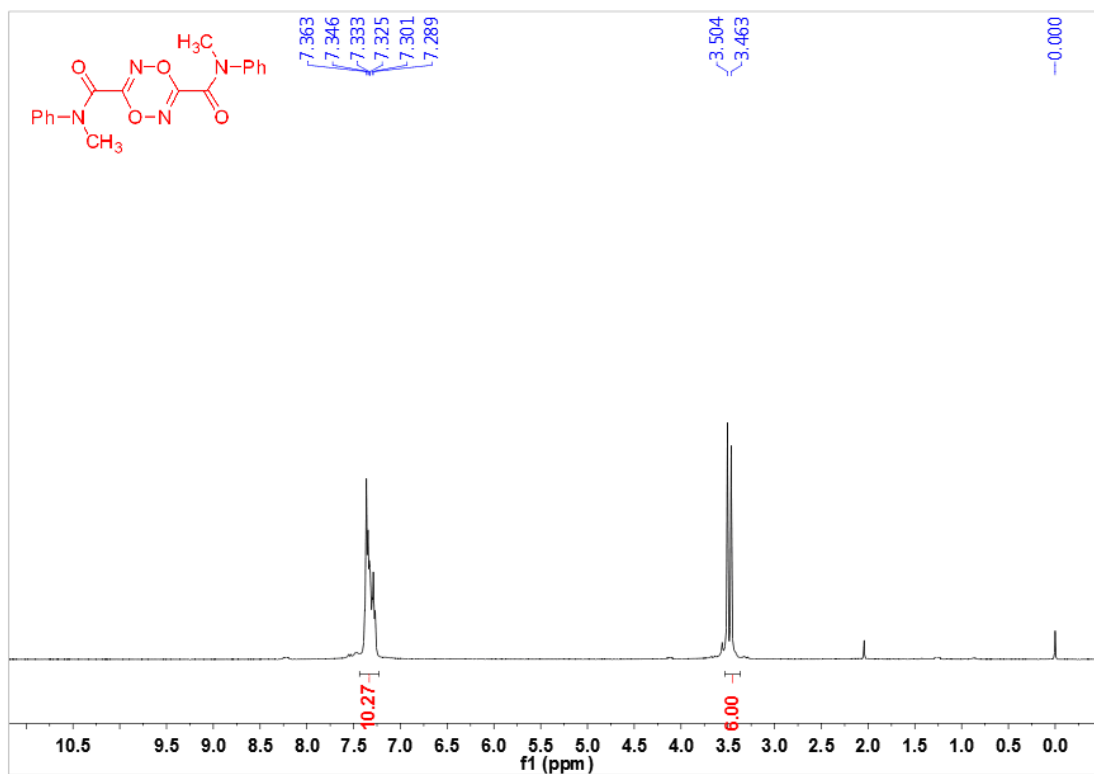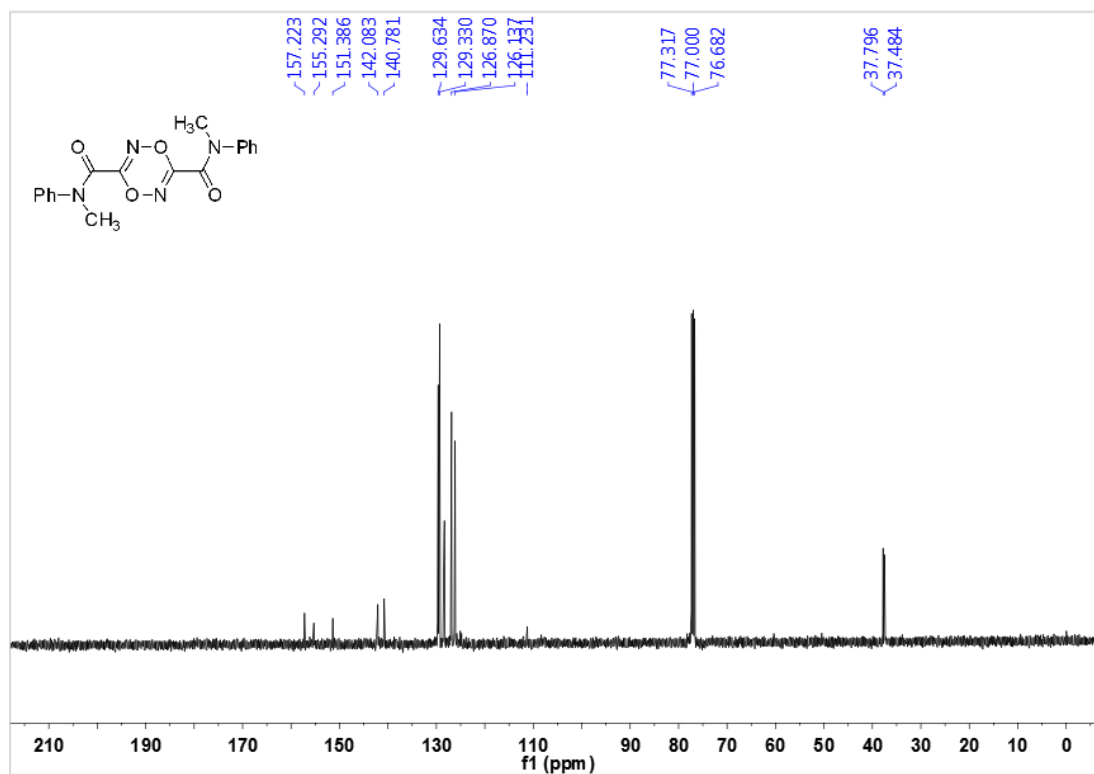

Copies of  $^1\text{H}$  and  $^{13}\text{C}$  NMR spectra of **3d**

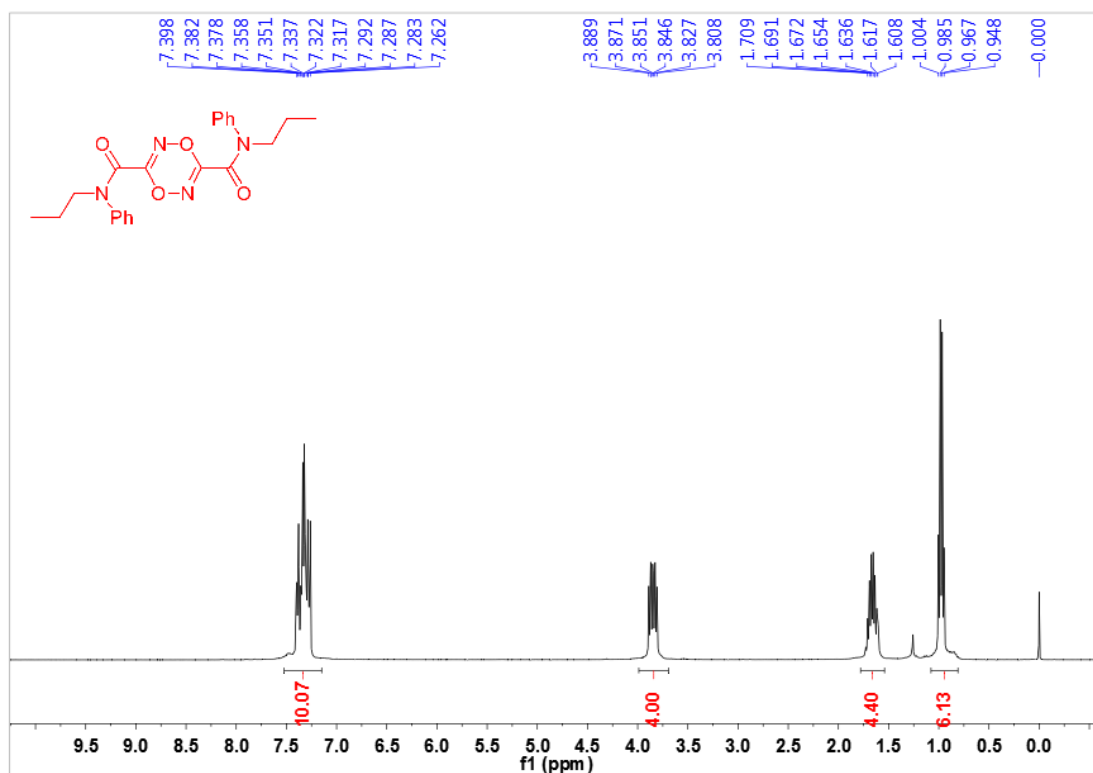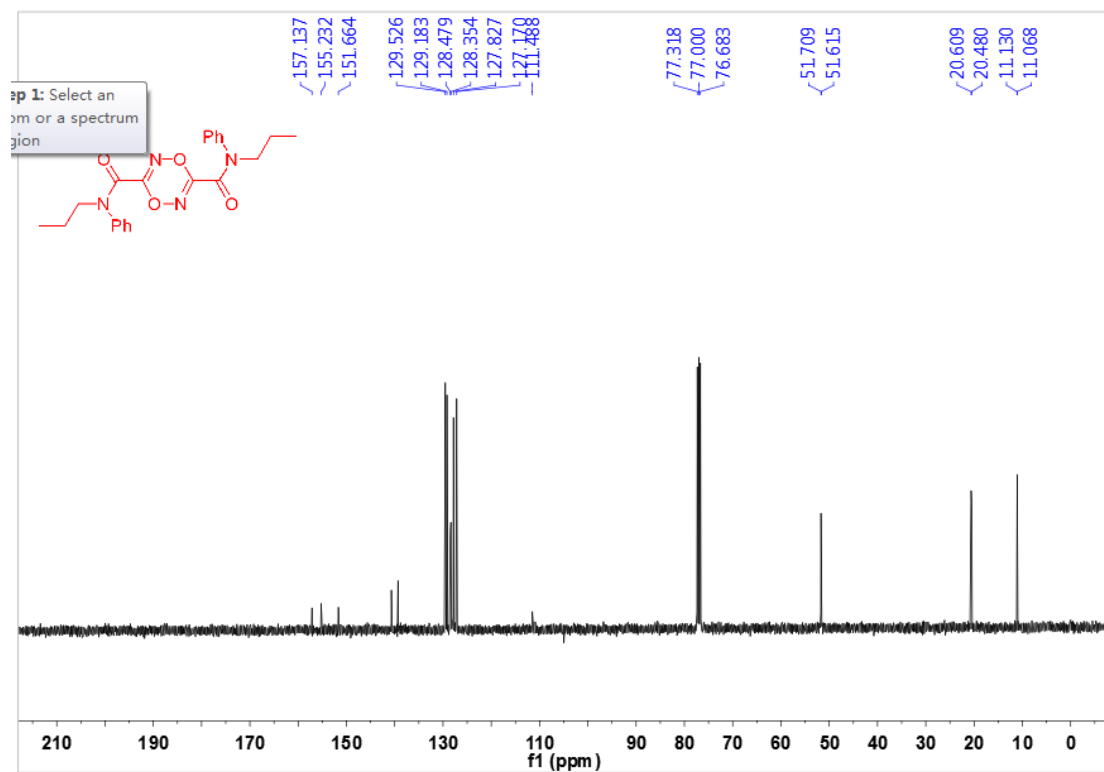

Copies of  $^1\text{H}$  and  $^{13}\text{C}$  NMR spectra of **3e**

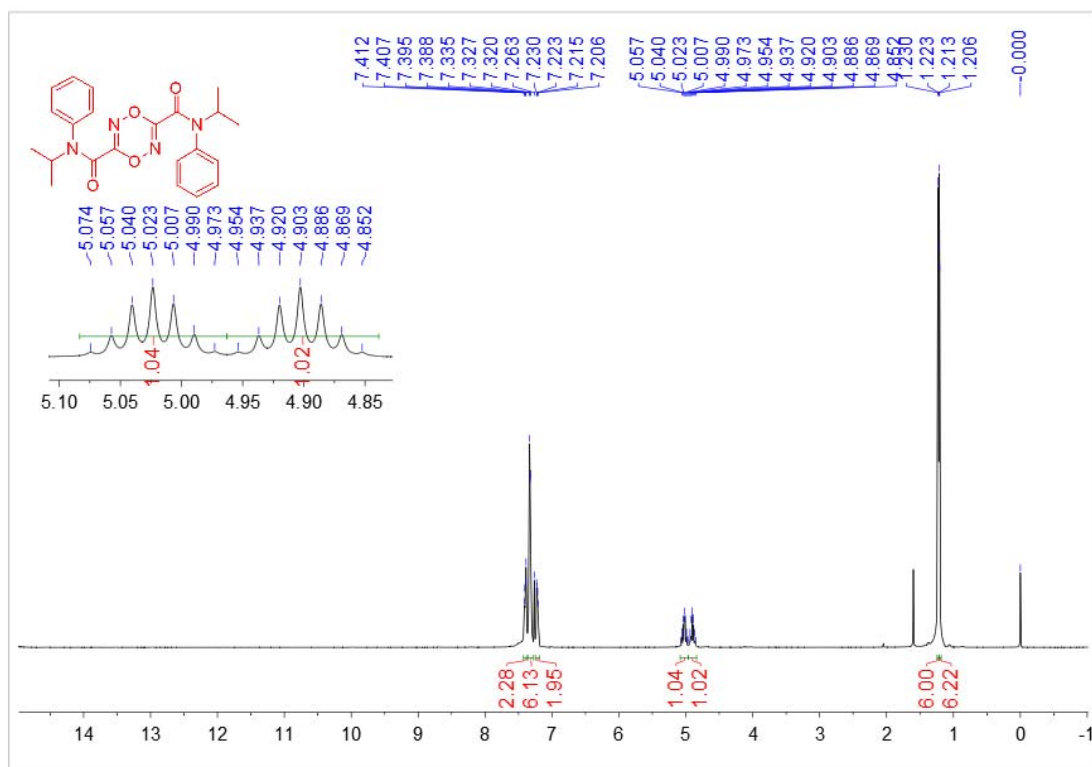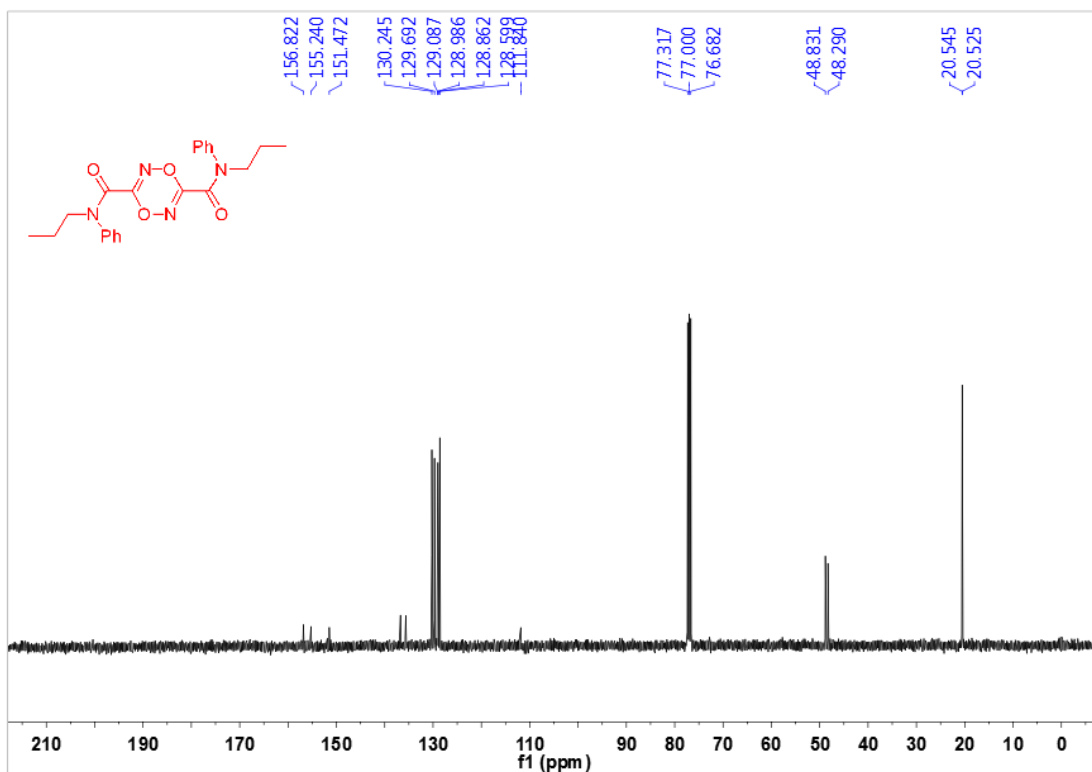

Copies of  $^1\text{H}$  and  $^{13}\text{C}$  NMR spectra of **3f**

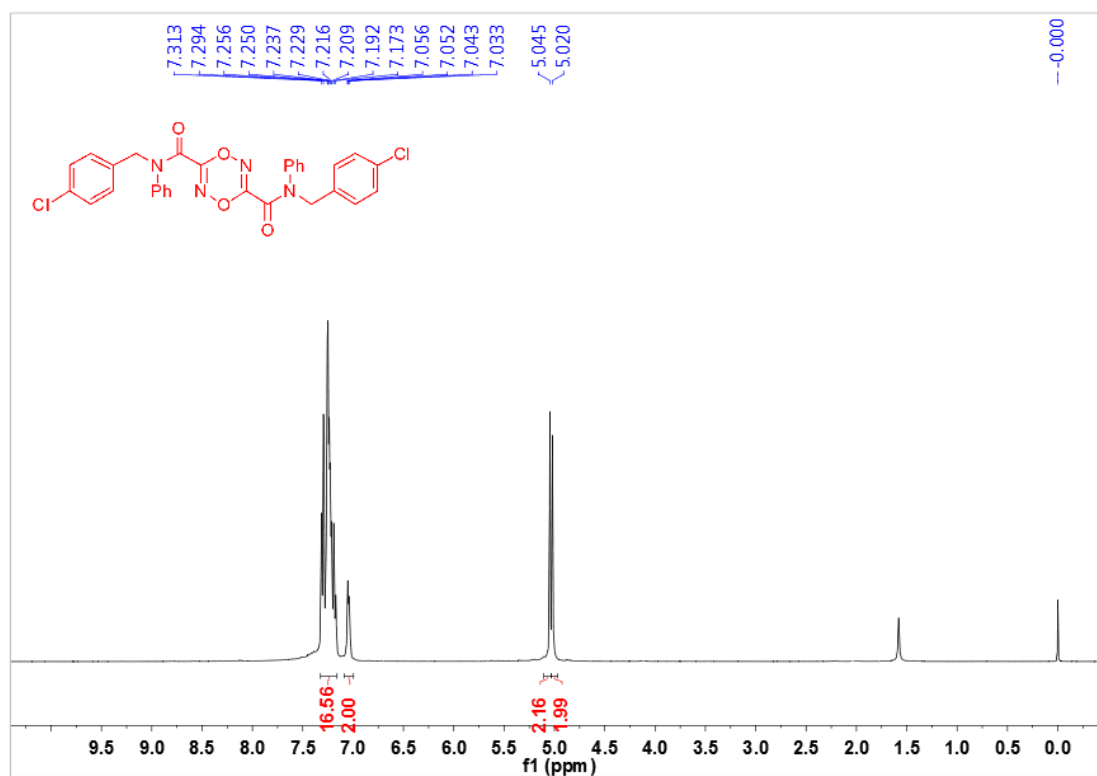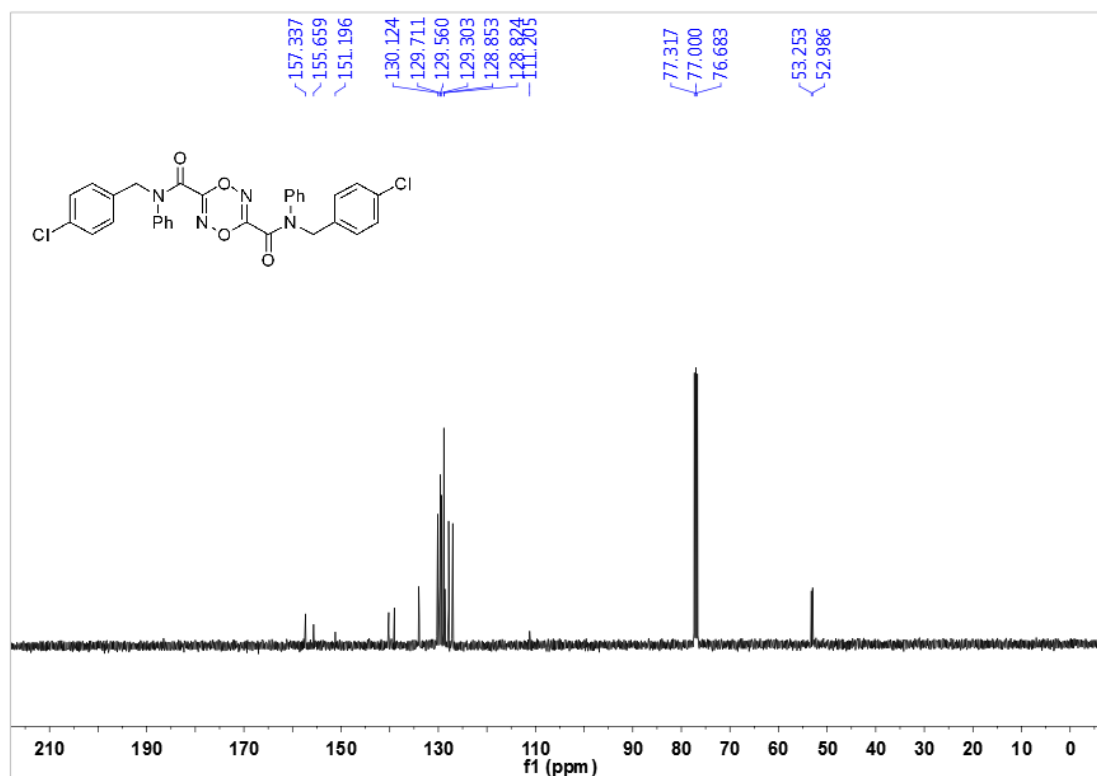

Copies of  $^1\text{H}$  and  $^{13}\text{C}$  NMR spectra of **3g**

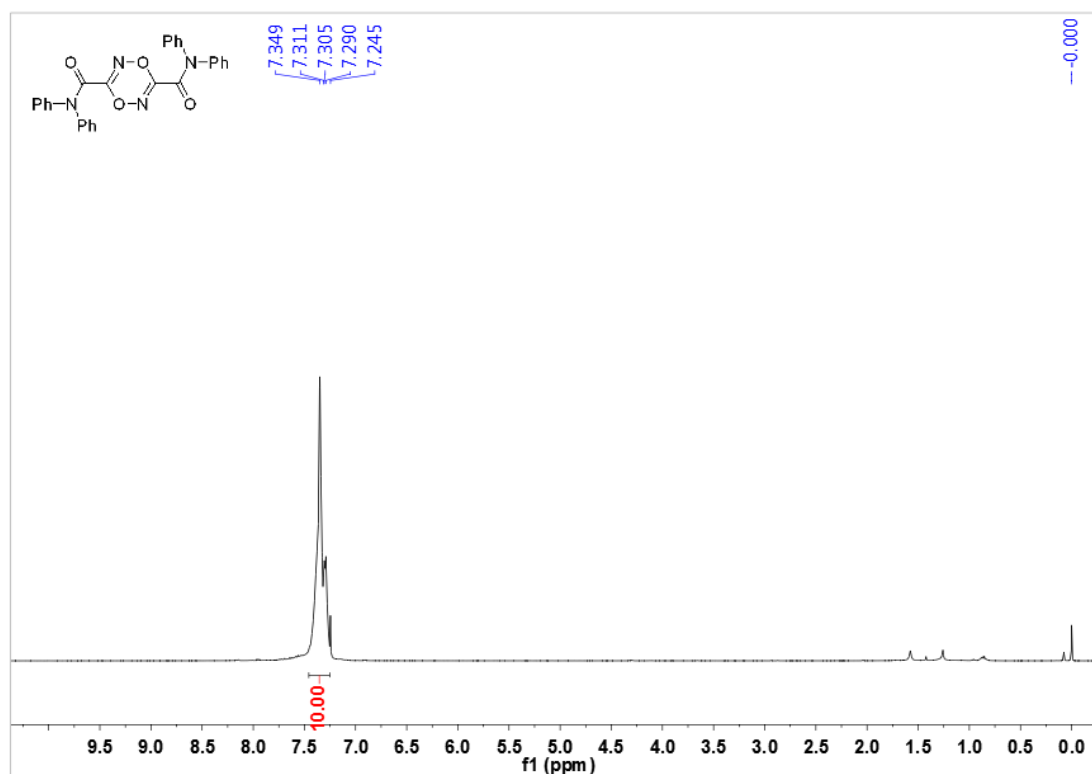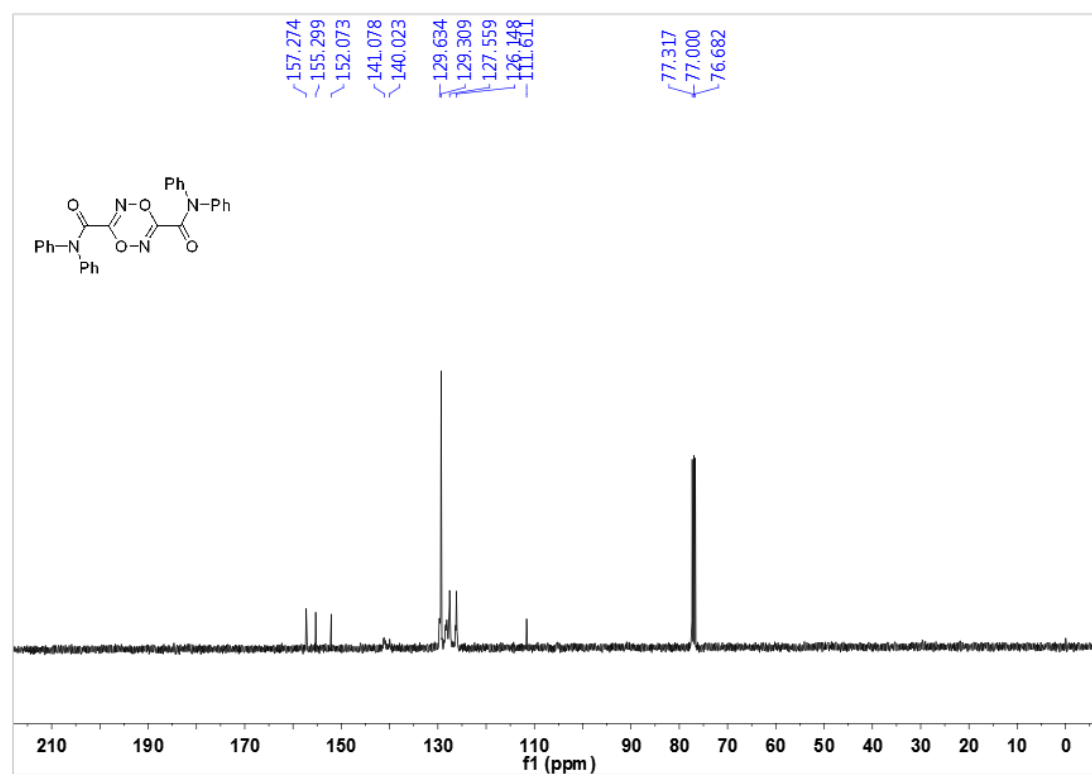

Copies of  $^1\text{H}$  and  $^{13}\text{C}$  NMR spectra of **3h**

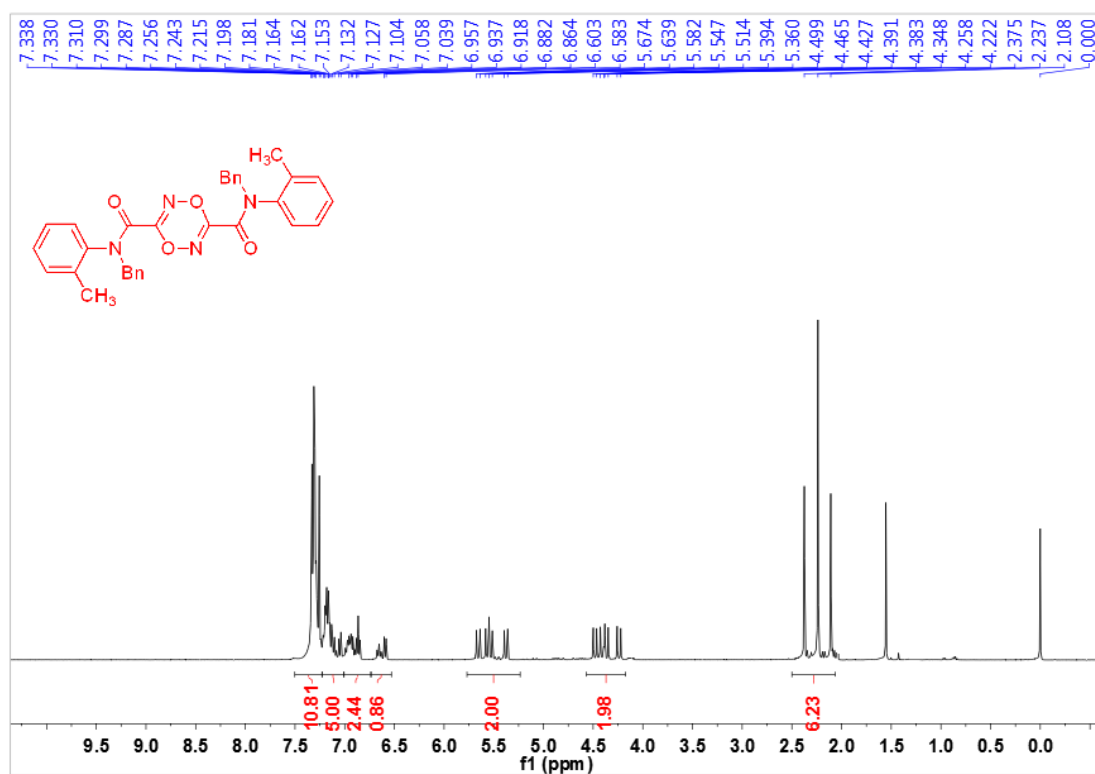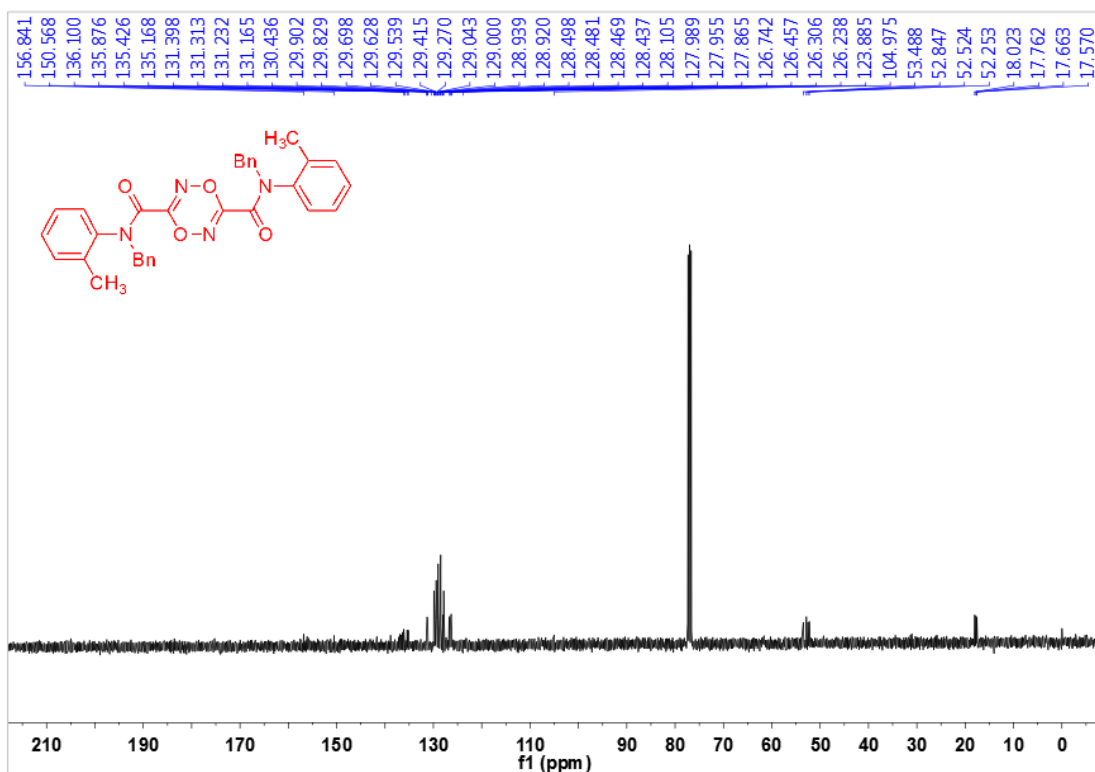

Copies of  $^1\text{H}$  and  $^{13}\text{C}$  NMR spectra of **3i**

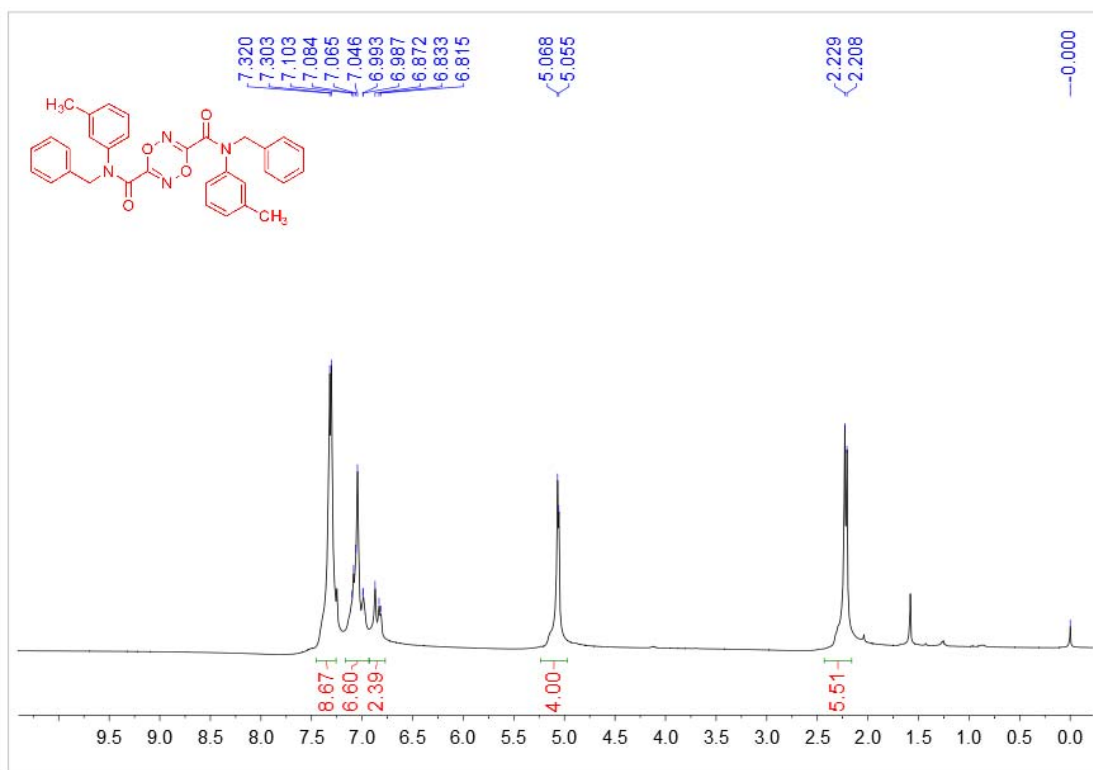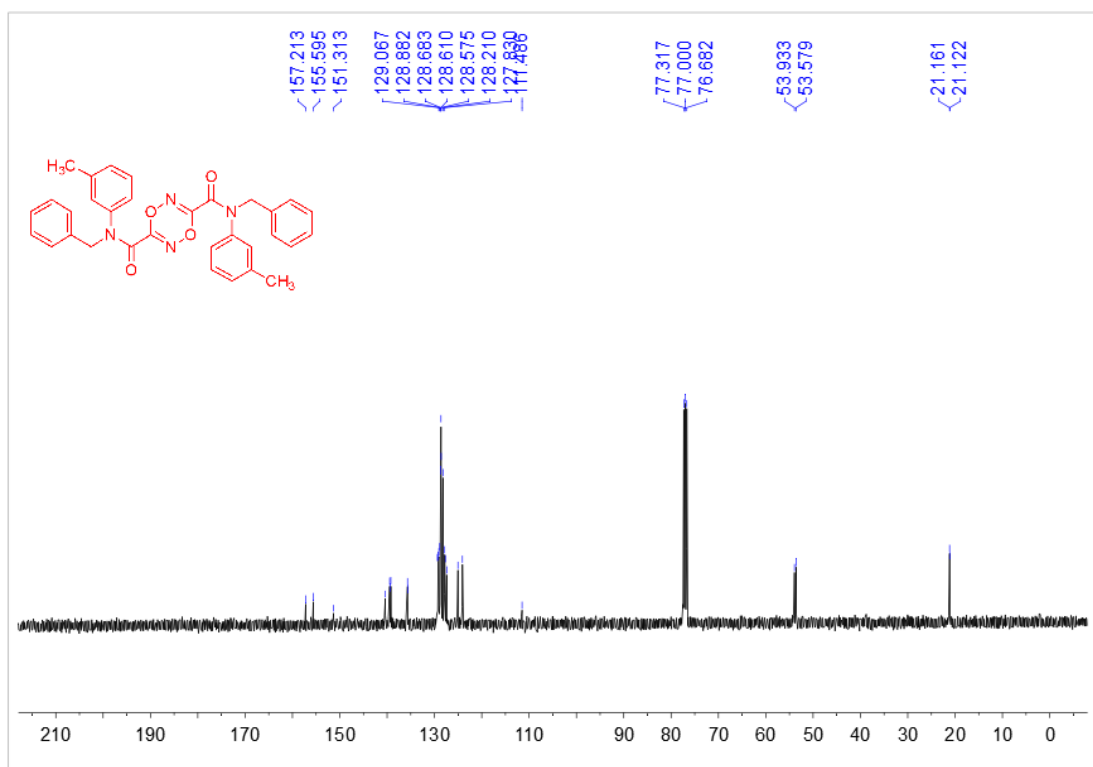

Copies of  $^1\text{H}$  and  $^{13}\text{C}$  NMR spectra of **3j**

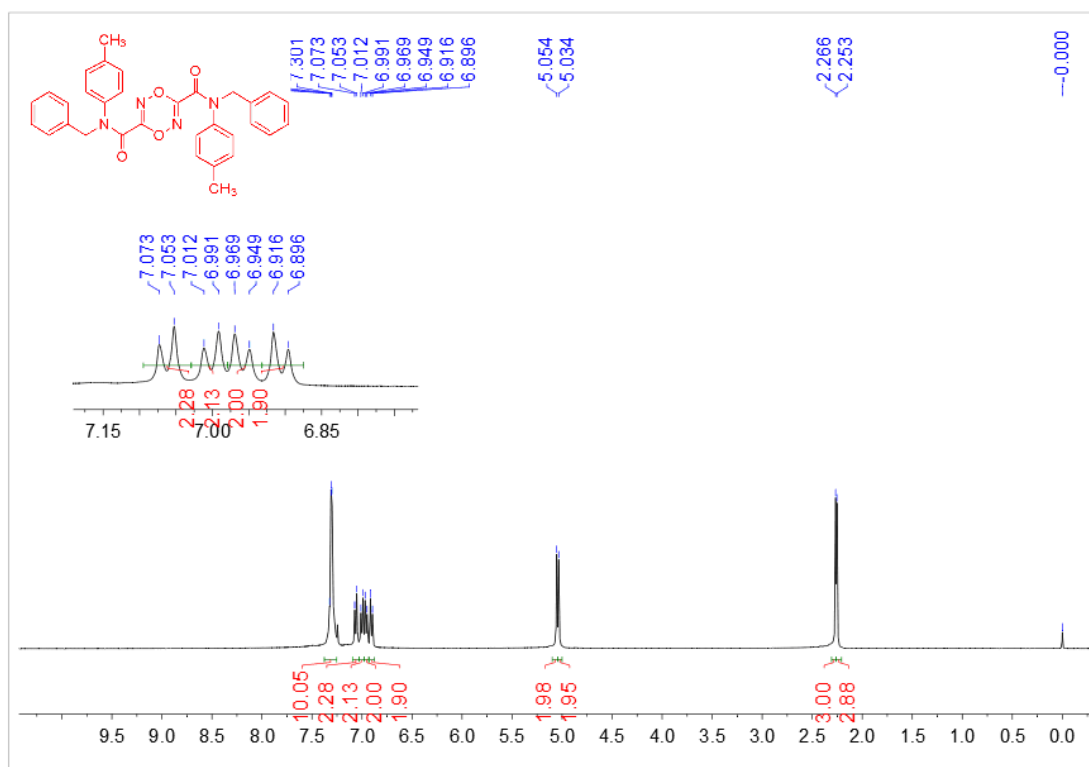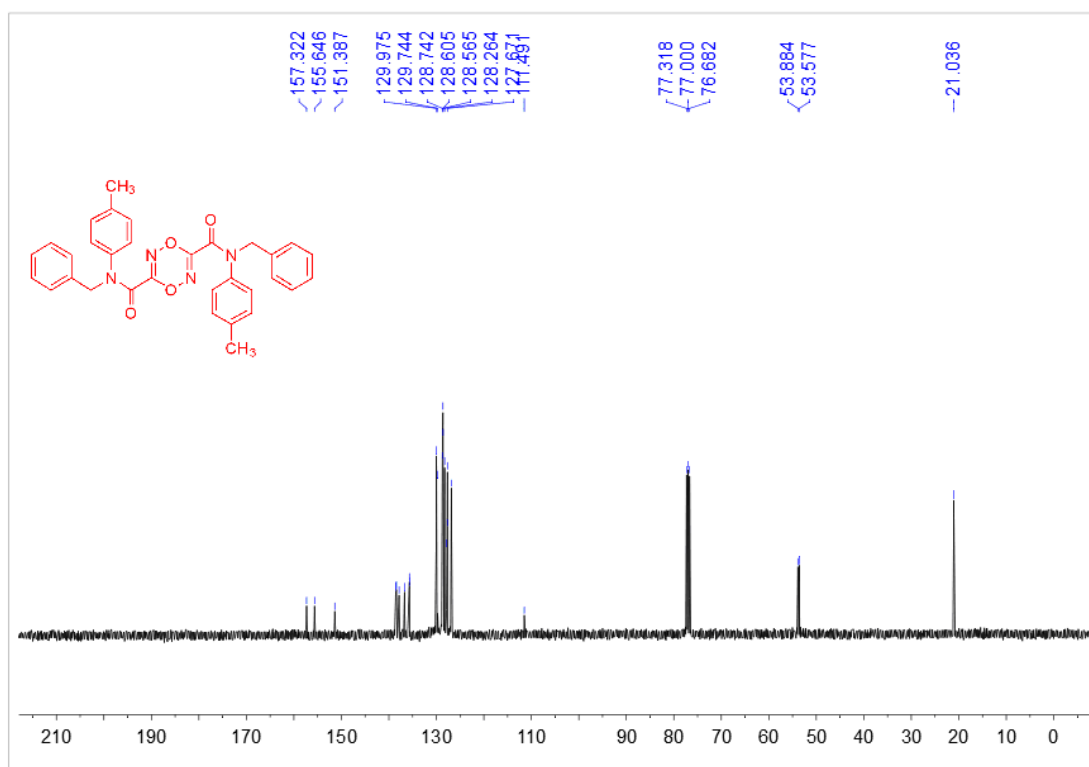



Copies of  $^1\text{H}$  and  $^{13}\text{C}$  NMR spectra of **3k**

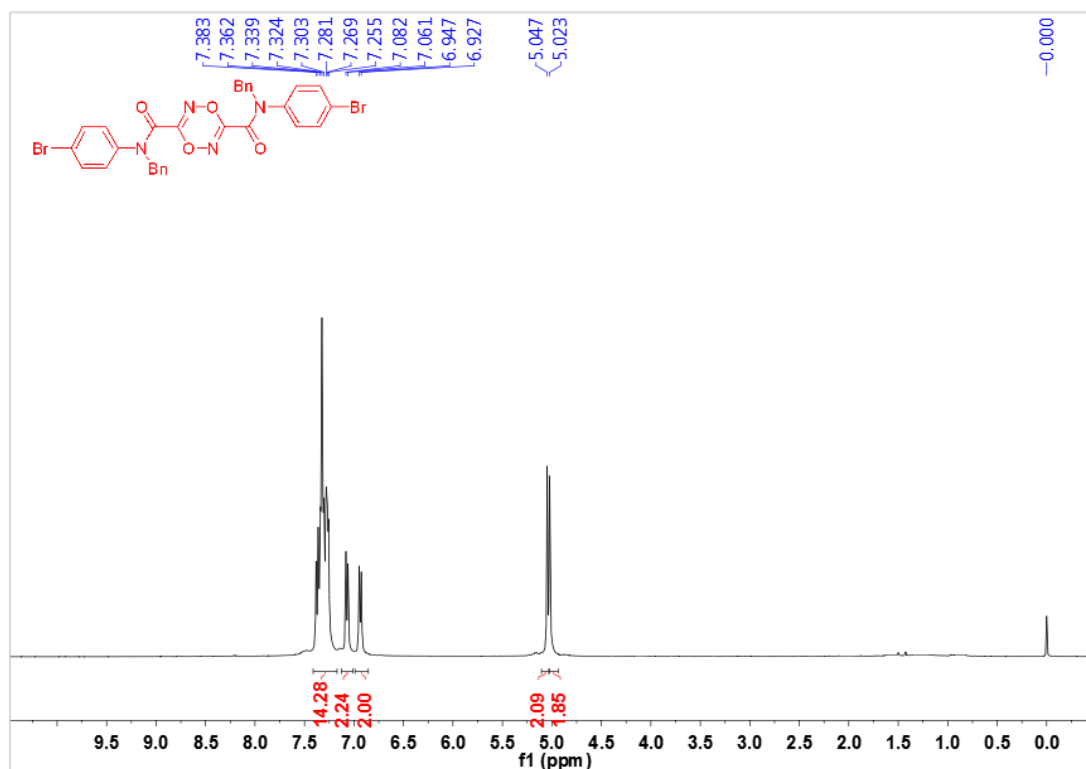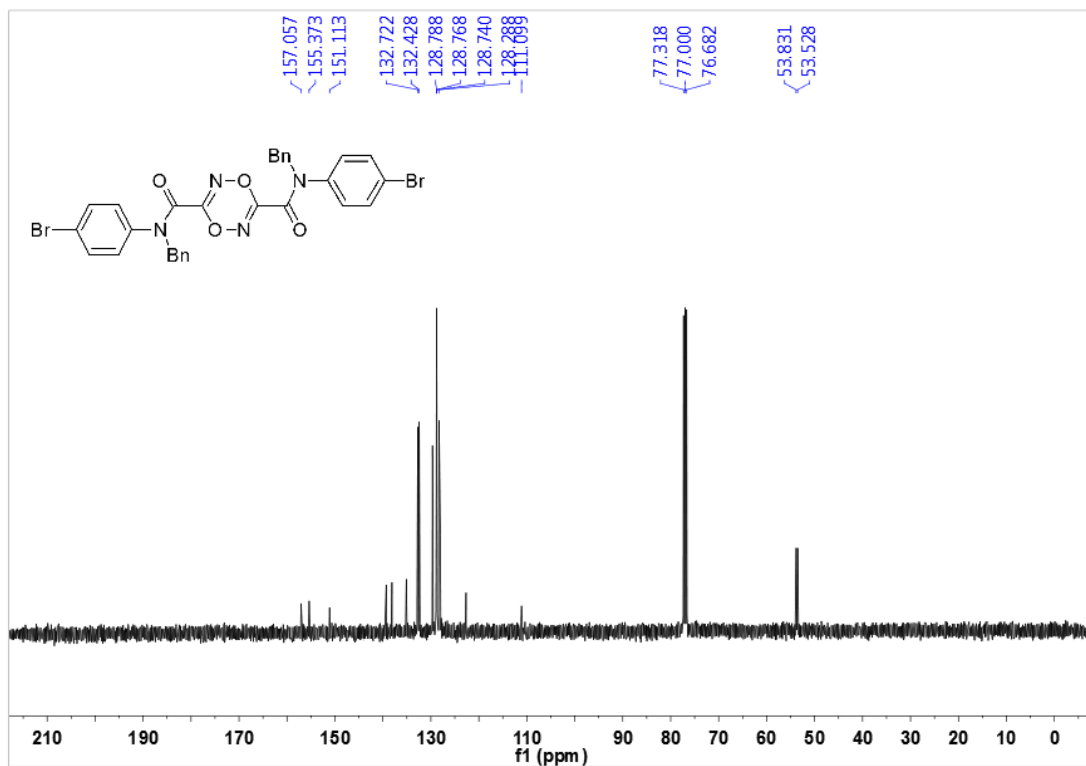

Copies of  $^1\text{H}$  and  $^{13}\text{C}$  NMR spectra of **3I**

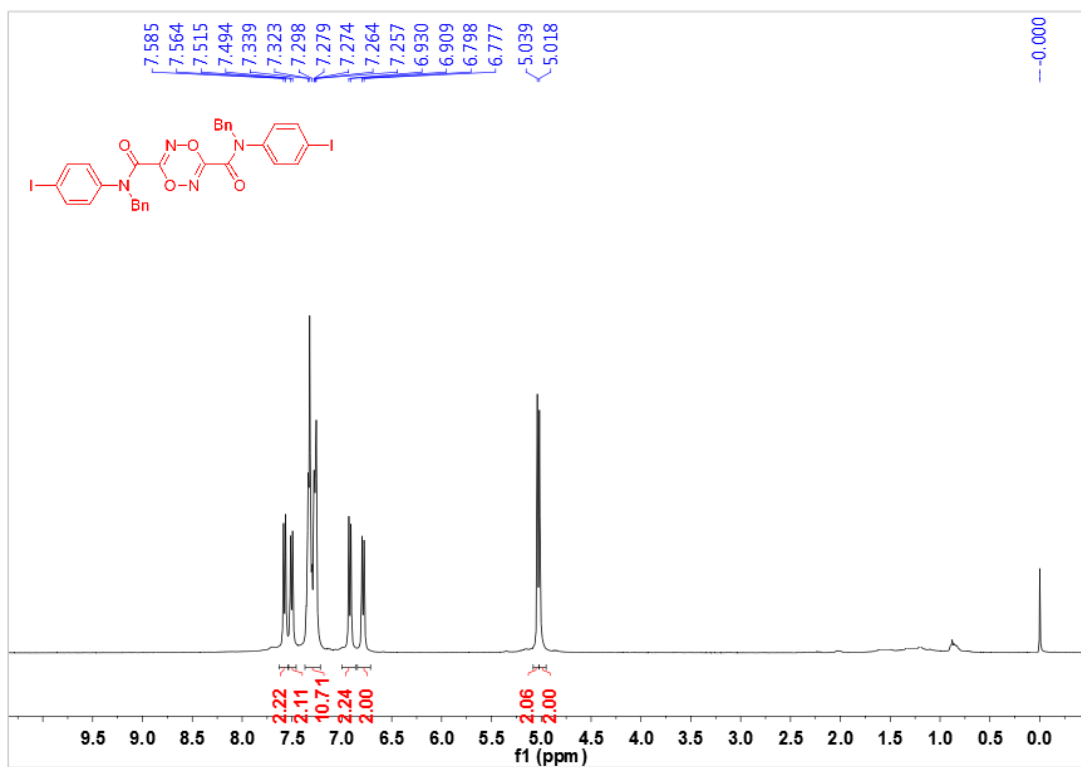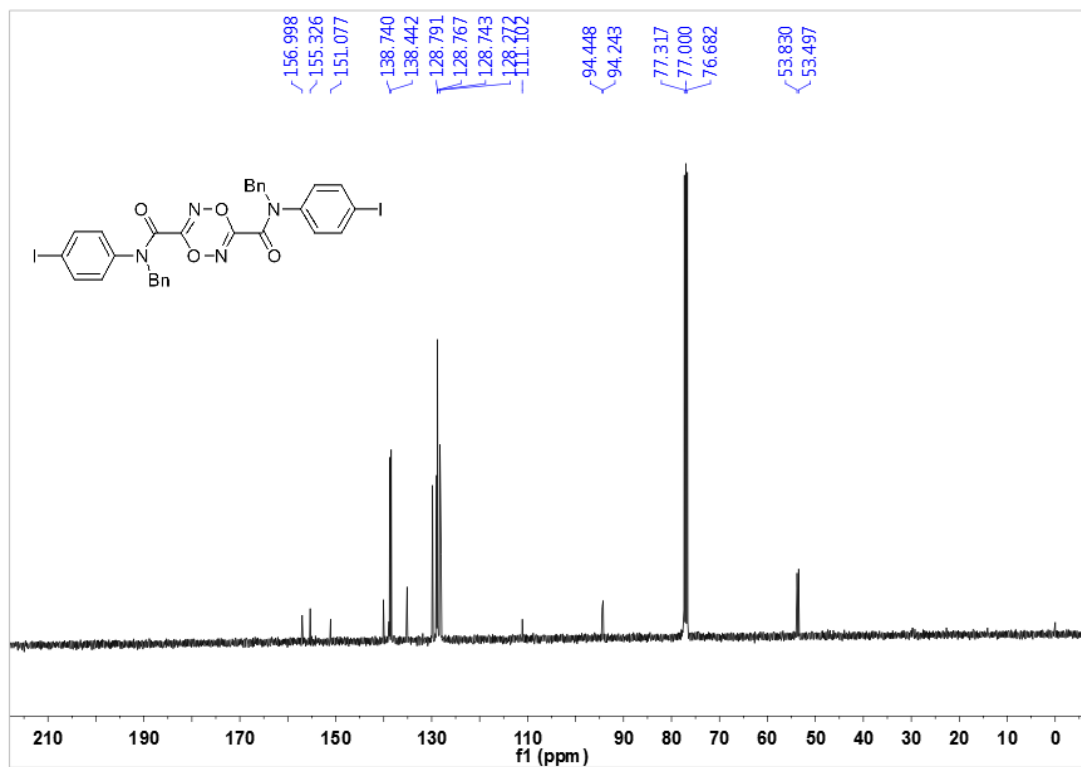

Copies of  $^1\text{H}$  and  $^{13}\text{C}$  NMR spectra of **2m**

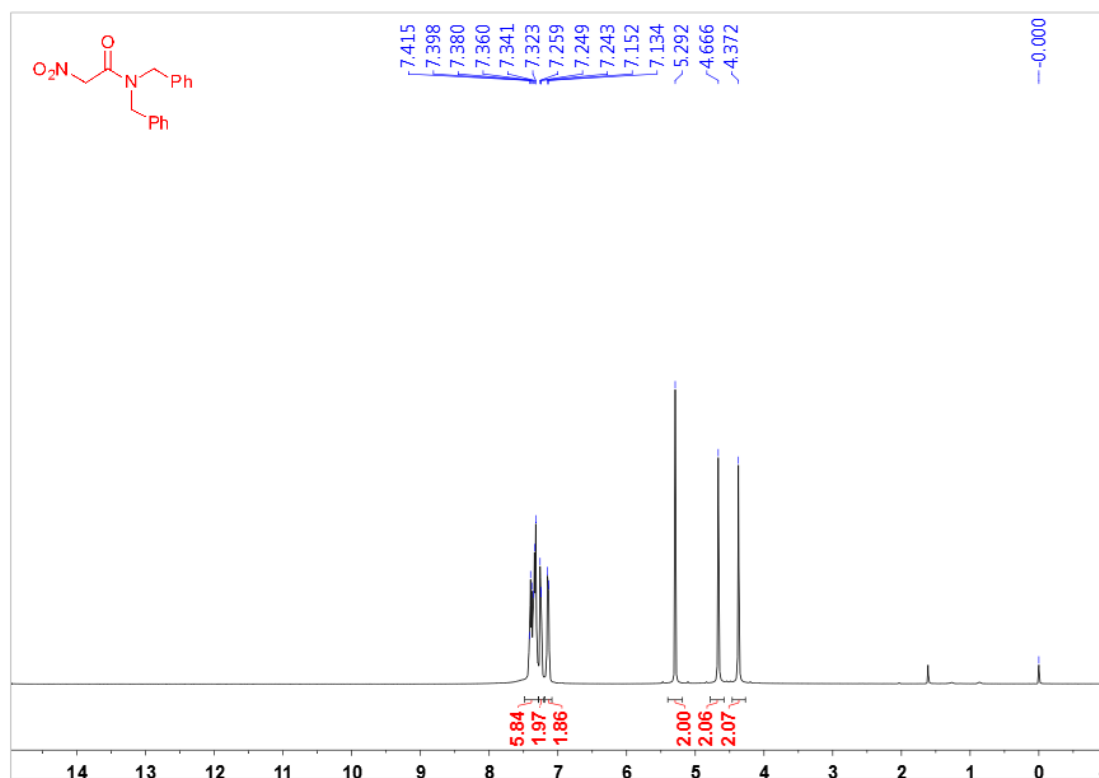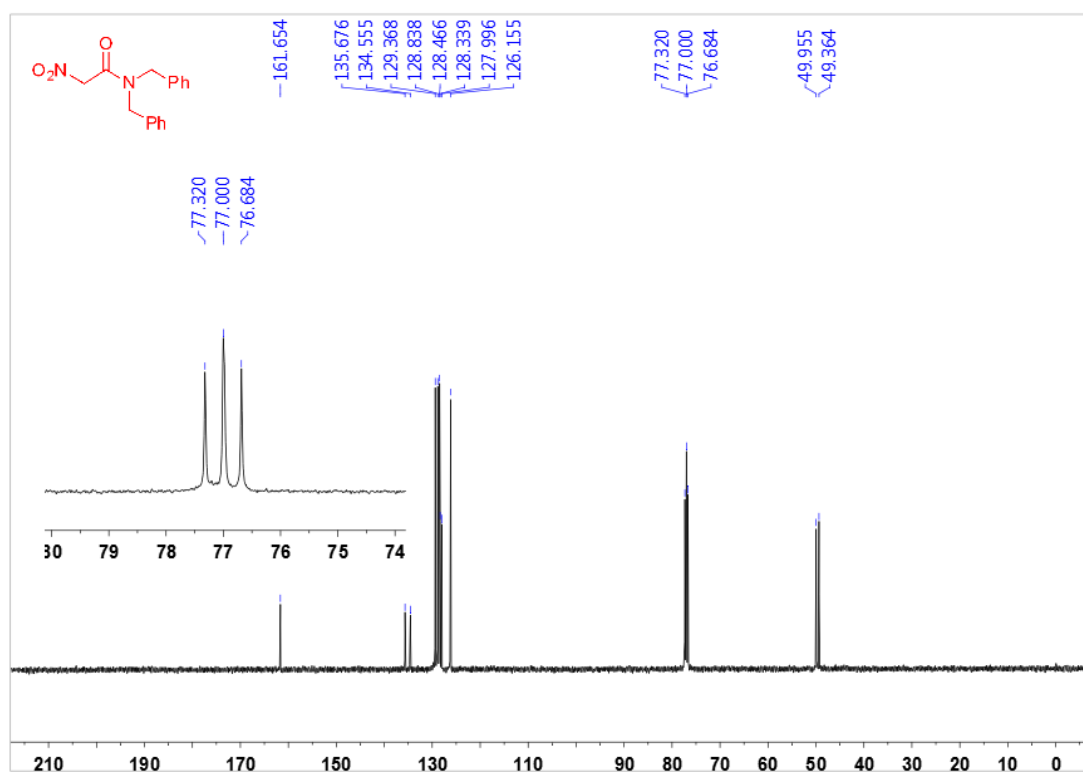

Copies of  $^1\text{H}$  and  $^{13}\text{C}$  NMR spectra of **7a**

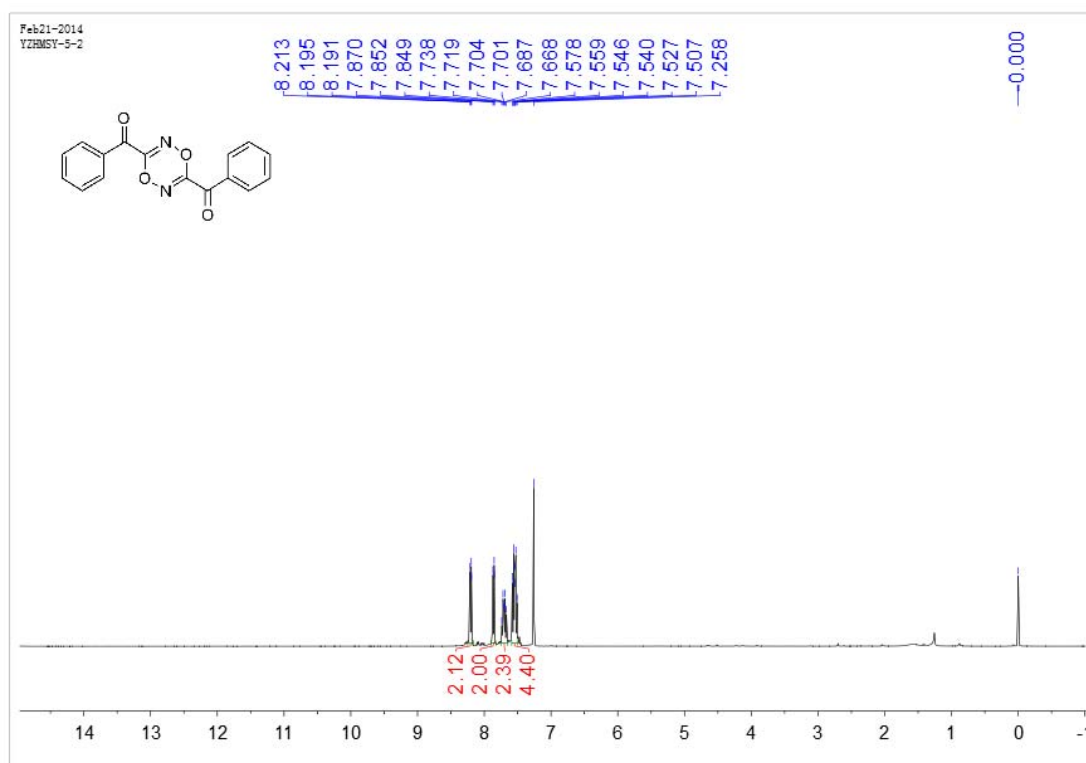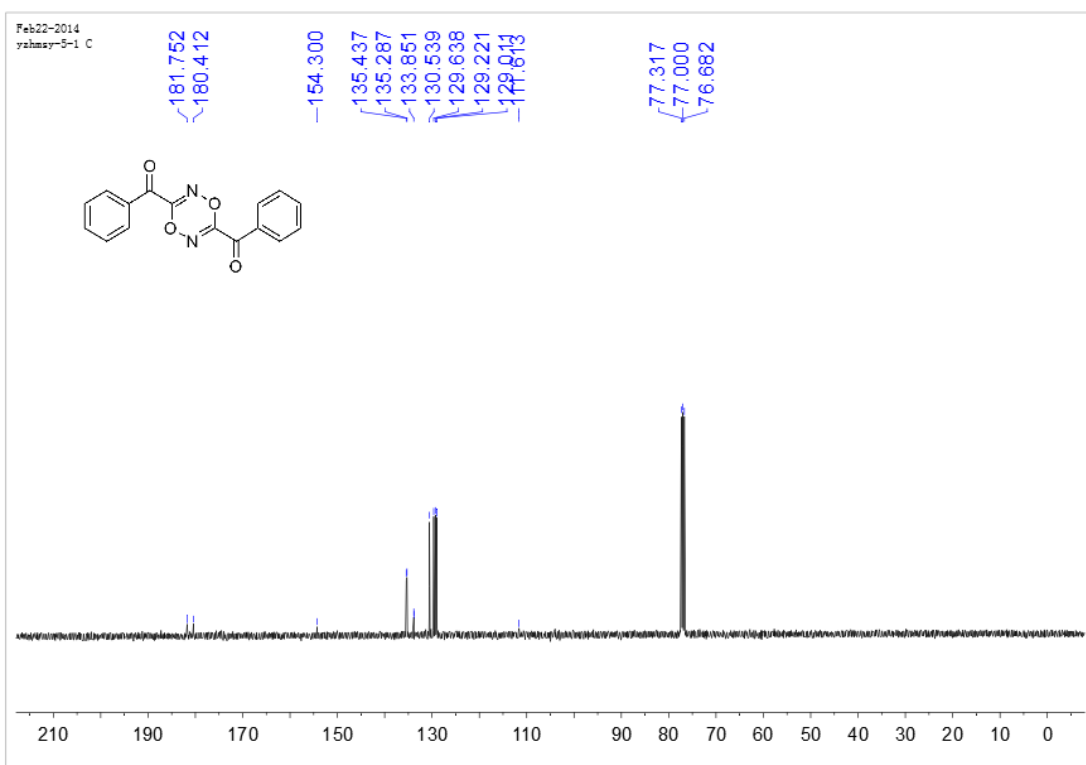

Copies of  $^1\text{H}$  and  $^{13}\text{C}$  NMR spectra of **6a**

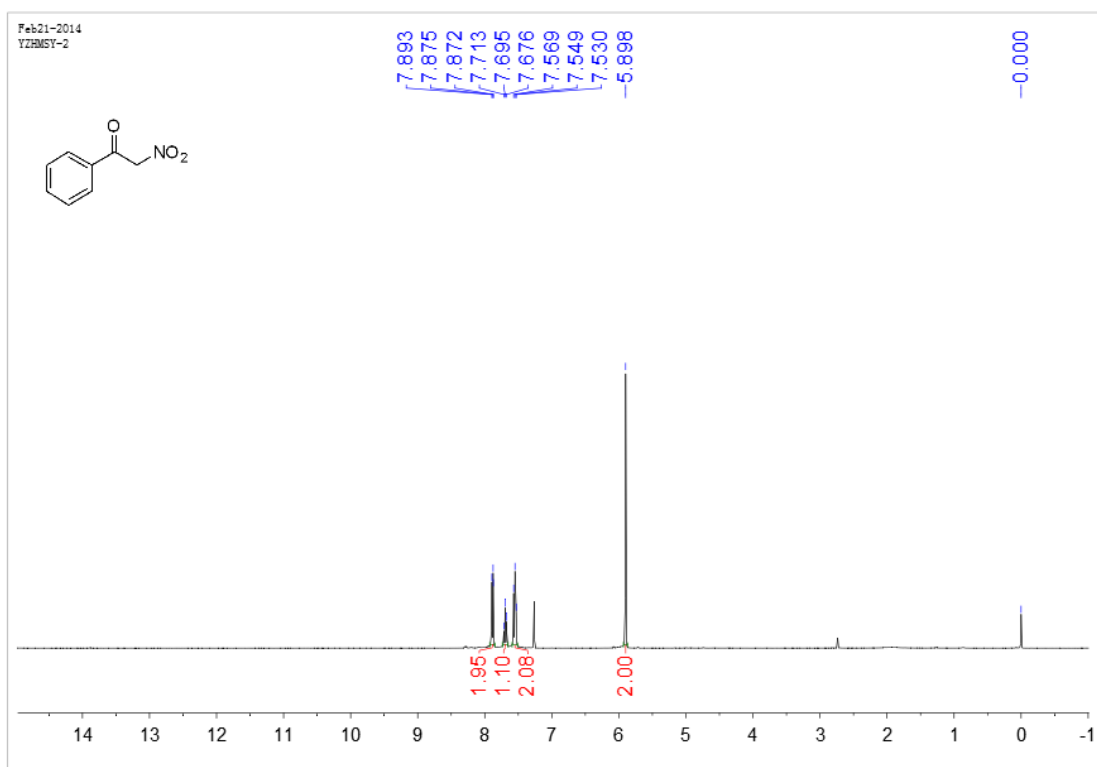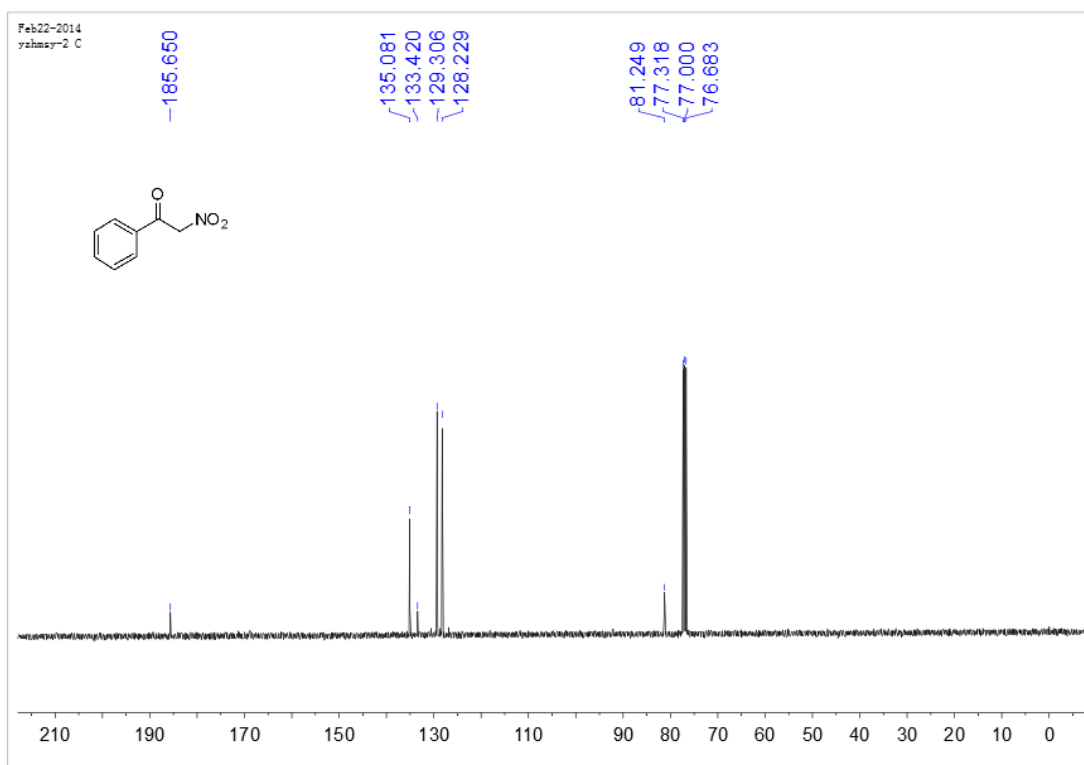

Copies of  $^1\text{H}$  and  $^{13}\text{C}$  NMR spectra of **6b**

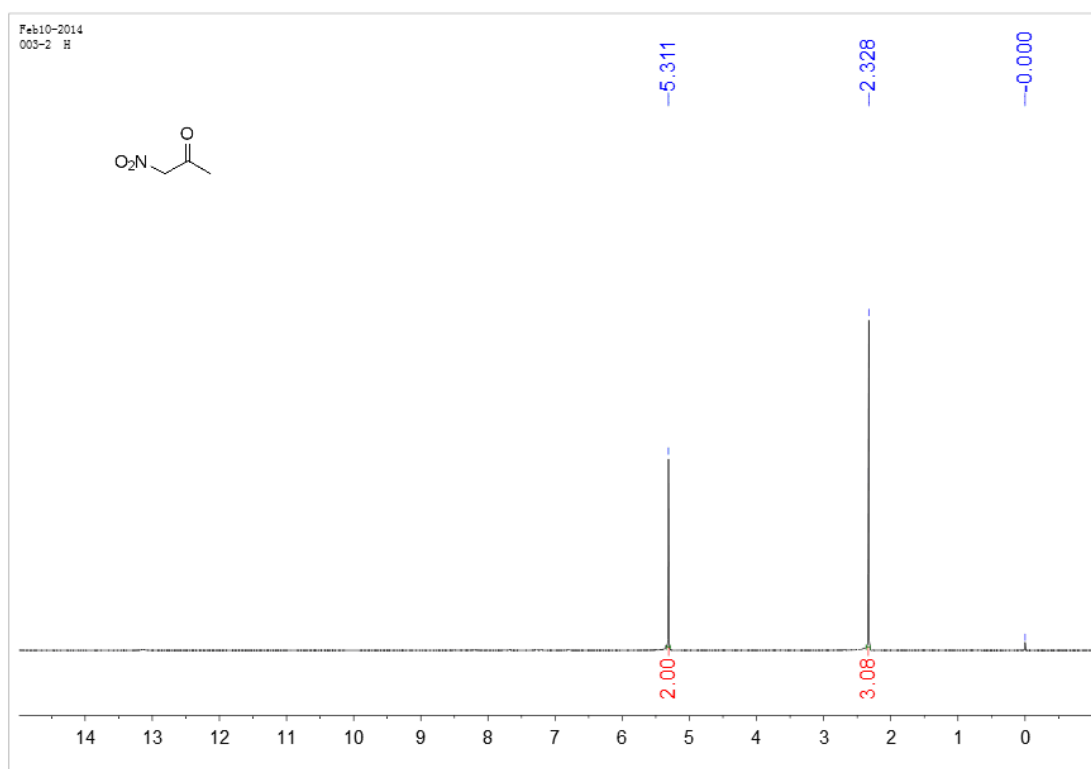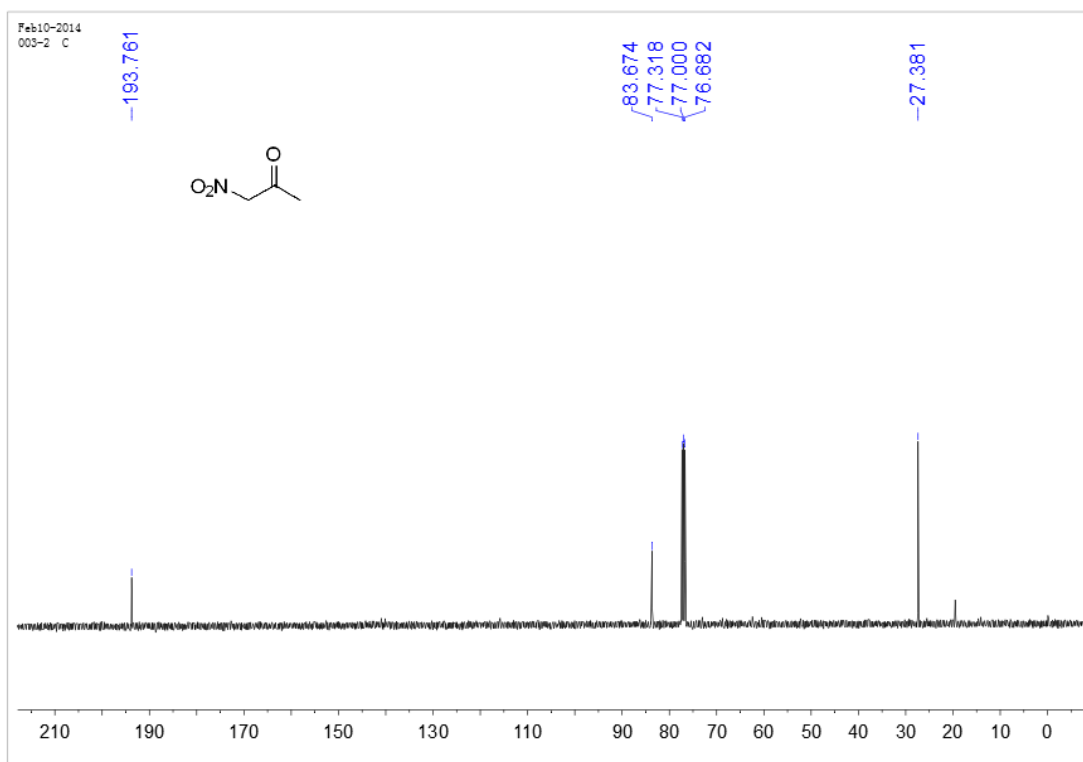

Copies of  $^1\text{H}$  and  $^{13}\text{C}$  NMR spectra of **8**

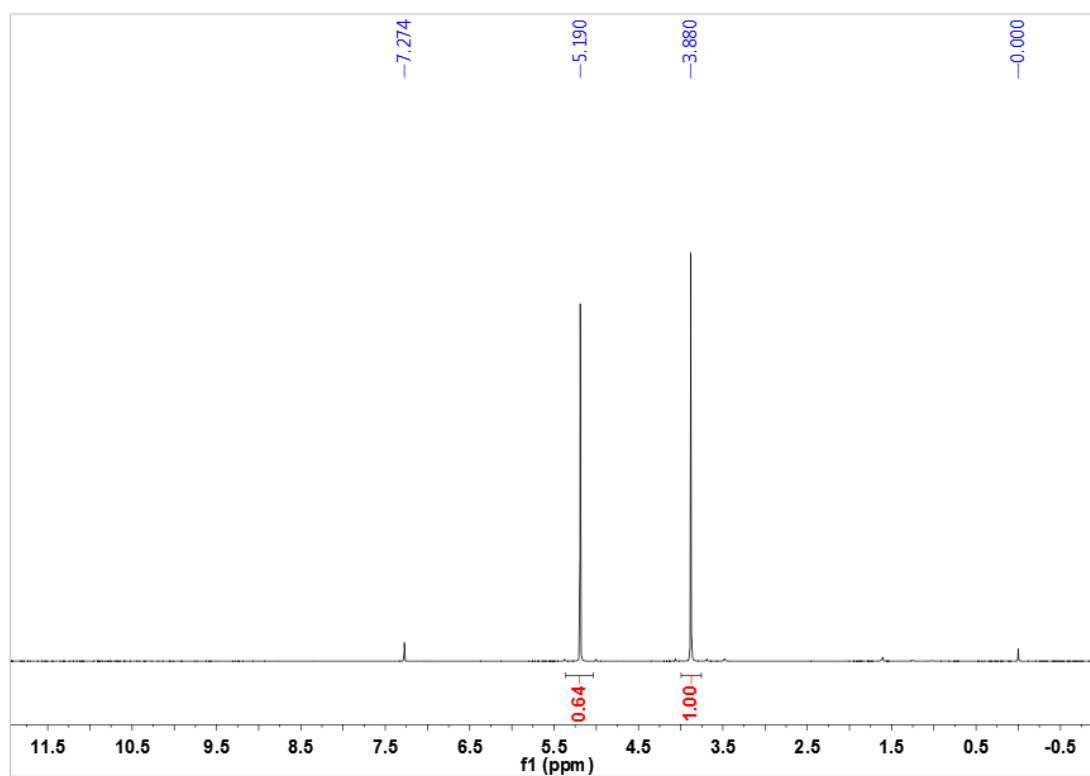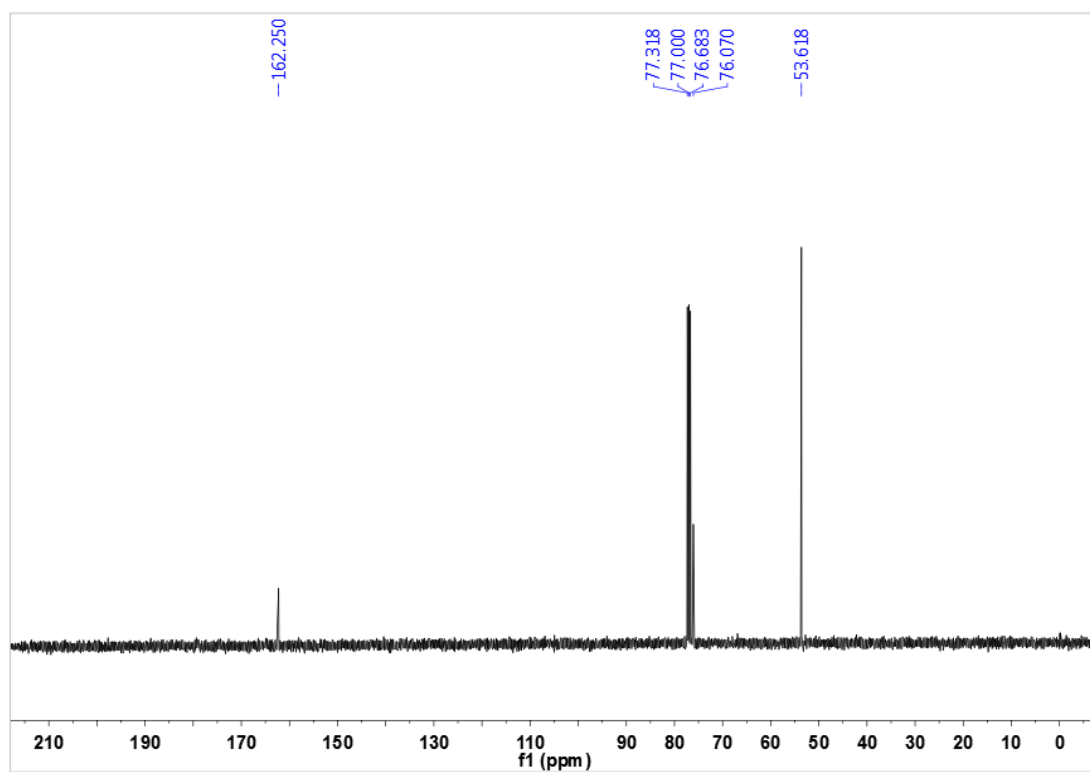

Copies of  $^1\text{H}$  and  $^{13}\text{C}$  NMR spectra of **10**

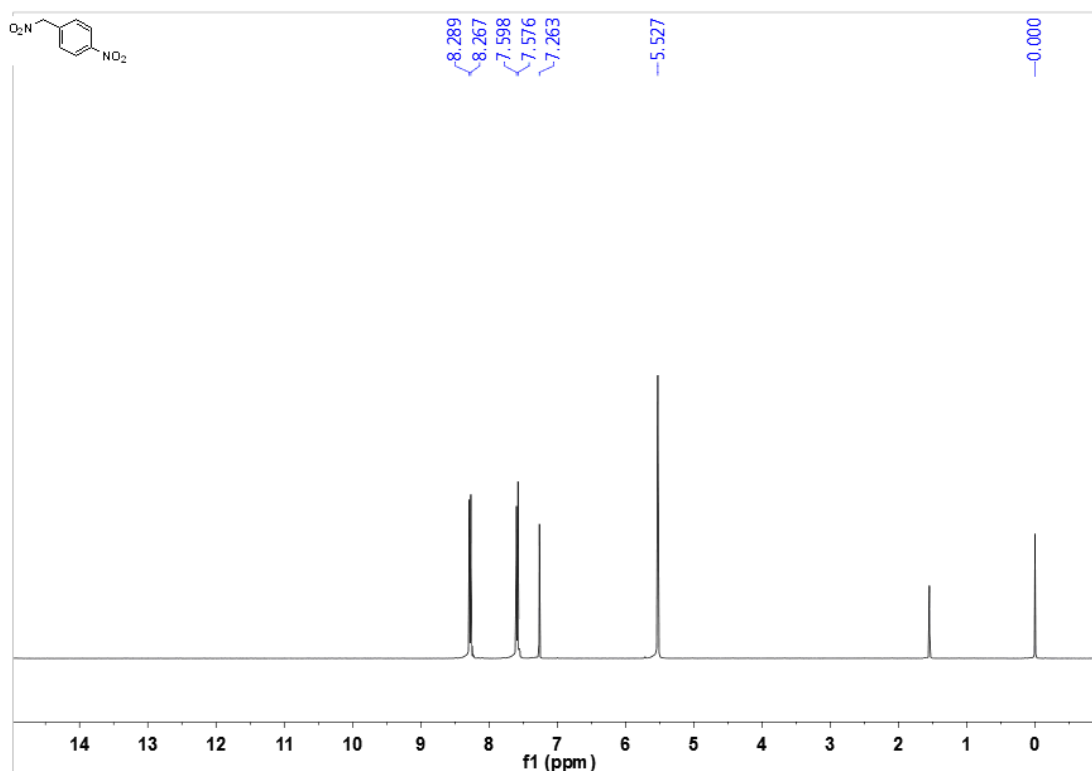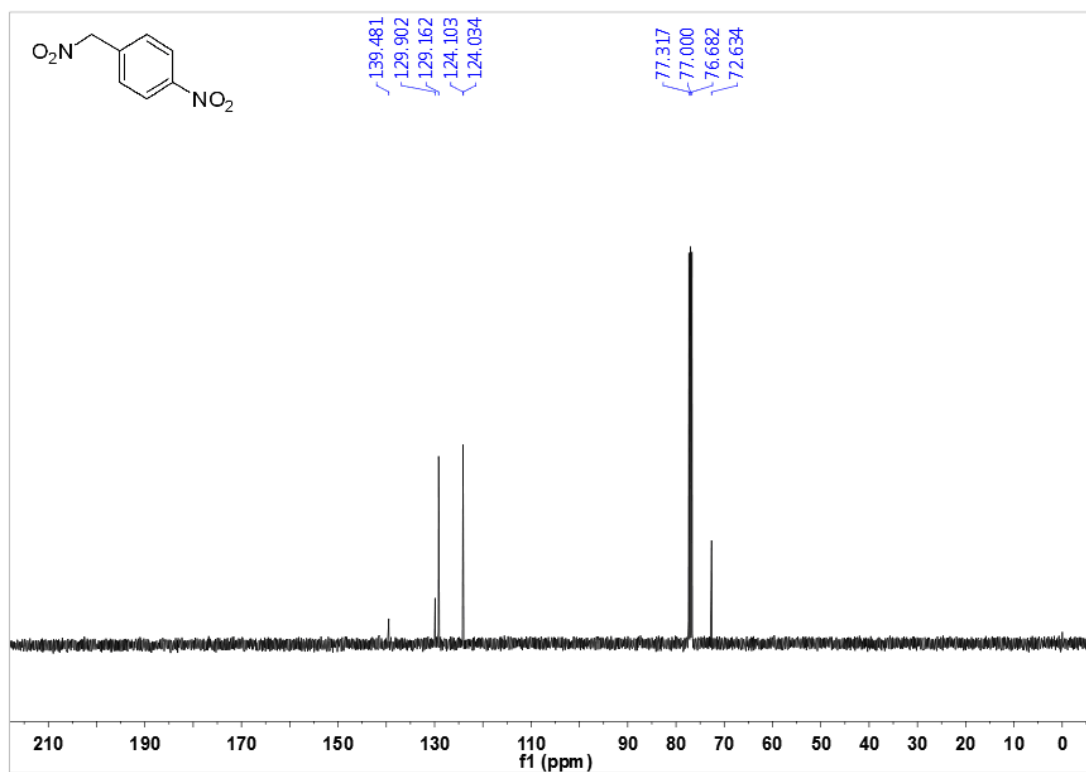

Supplement: c3ob42487a1.pdf [file c3ob42487a1.pdf]
